# Supplementary material for: An antisense promoter in mouse L1 retrotransposon open reading frame-1 initiates expression of diverse fusion transcripts and limits retrotransposition
Source: PubMed Central journal article supplement (PMC3985663; doi:10.1093/nar/gku091), 2014-01-31
Supplement: supp_gku091_nar-02689-v-2013-File007.pdf [file supp_gku091_nar-02689-v-2013-File007.pdf]

**Li et al. An antisense promoter in mouse L1 retrotransposon open reading frame-1 (ORF1) initiates expression of diverse fusion transcripts and limits retrotransposition****SUPPLEMENTARY TABLES.**

Table S1. **Candidate promoter fragments and primers used in this study.**

**(A)** Candidate mouse L1 promoter fragments, for testing in promoter assays (Fig. 1, Fig. S1), were recovered by PCR amplification using forward and reverse primers as indicated here, and cloned directionally upstream of *TEM1* beta-lactamase reporter. Restriction endonuclease sites for directional subcloning are indicated (*lowercase*).

| Frag. | Subfamily      | Oligo IDs | Position in L1spa | Length | Ori. | Forward oligo (5'- 3')            | Reverse oligo (5'- 3')          |
|-------|----------------|-----------|-------------------|--------|------|-----------------------------------|---------------------------------|
| 1     | T <sub>F</sub> | 1212/1213 | 14-1786           | 1773bp | s    | agatctATTAGTCTGAACAGGTGAGAGG      | ccatggCTGGTAATCTCTGGAGTTAG      |
| 2     | T <sub>F</sub> | 1298/1797 | 2150-1801         | 350bp  | as   | ccatggACGGAGGAATCTTACTAACAGG      | agatctGAGTTTCTTTATTGTGTCTACTTCC |
| 3     | T <sub>F</sub> | 1298/1219 | 2648-1801         | 848bp  | as   | ccatggACGGAGGAATCTTACTAACAGG      | agatctCTGGTGAATTCTGATAGGCTTG    |
| 4     | T <sub>F</sub> | 1299/1797 | 2150-1883         | 268bp  | as   | ccatggCCCAACACACCTGAGAACCT        | agatctGAGTTTCTTTATTGTGTCTACTTCC |
| 5     | T <sub>F</sub> | 1299/1219 | 2648-1883         | 766bp  | as   | ccatggCCCAACACACCTGAGAACCT        | agatctCTGGTGAATTCTGATAGGCTTG    |
| 6     | T <sub>F</sub> | 1218/1220 | 2823-2125         | 699bp  | as   | ccatggGGAAGTAGACACAATAAAGAAAACCTC | agatctTTCGTGGAGAGATAATGCGTG     |
| 7     | T <sub>F</sub> | 1218/1221 | 3136-2125         | 1012bp | as   | ccatggGGAAGTAGACACAATAAAGAAAACCTC | agatctCCTTTCATTCTGAGGTAGTGTC    |
| 8     | T <sub>F</sub> | 2093/1220 | 2823-2626         | 198bp  | as   | ccatggCAAGCCTATCAGAATTACACCAG     | agatctTTCGTGGAGAGATAATGCGTG     |
| 9     | T <sub>F</sub> | 2093/1221 | 3136-2626         | 511bp  | as   | ccatggCAAGCCTATCAGAATTACACCAG     | agatctCCTTTCATTCTGAGGTAGTGTC    |
| 10    | T <sub>F</sub> | 1221/1798 | 3136-2803         | 334bp  | as   | ccatggCACGCATTATCTCTCCACGAA       | agatctCCTTTCATTCTGAGGTAGTGTC    |
| 11    | T <sub>F</sub> | 1459/1460 | 4420-2931         | 1490bp | as   | ccatggCACAGAACAGAATGCCACC         | agatctTCTTTGAAGGTCTGATAG        |
| 12    | T <sub>F</sub> | 1461/1462 | 5296-4471         | 826bp  | as   | ccatggGTATTCTACCCAATCATTTTATG     | agatctTTCACTTCCTTCGTTAG         |
| 13    | T <sub>F</sub> | 1463/1464 | 6905-5378         | 1528bp | as   | ccatggATGGATTGGCAGGACCAAC         | agatctGTGTTTTGTCCCCTTCTAAG      |
| 14    | T <sub>F</sub> | 2096/2097 | 1801-2150         | 350bp  | s    | agatctACGGAGGAATCTTACTAACAGG      | ccatggGAGTTTCTTTATTGTGTCTACTTCC |
| 15    | T <sub>F</sub> | 2096/2098 | 1801-3136         | 1336bp | s    | agatctACGGAGGAATCTTACTAACAGG      | ccatggCCTTTCATTCTGAGGTAGTGTC    |
| 16    | Synthetic      | 2010/2012 | 2150-1801         | 350bp  | as   | ccatggTGACCAACCGCAACCAGGAC        | agatctAGGCCAGGATGGTCTTGTC       |
| 17    | Synthetic      | 2010/2013 | 2648-1801         | 848bp  | as   | ccatggTGACCAACCGCAACCAGGAC        | agatctGGATGCGGTCTTGTCAGG        |
| 18    | Synthetic      | 2010/2099 | 2823-1801         | 1023bp | as   | ccatggTGACCAACCGCAACCAGGAC        | agatctTTGGTCTTGTGCGTGGAAACACC   |
| 19    | Synthetic      | 2010/2100 | 3136-1801         | 1336bp | as   | ccatggTGACCAACCGCAACCAGGAC        | agatctAACAGAAGGTGGGCTCCTGC      |
| 20    | Synthetic      | 2011/2013 | 2648-2125         | 524bp  | as   | ccatggAACAAGACCATCCTGGACCTG       | agatctGGATGCGGTCTTGTCAGG        |
| 21    | Synthetic      | 2011/2099 | 2823-2125         | 699bp  | as   | ccatggAACAAGACCATCCTGGACCTG       | agatctTTGGTCTTGTGCGTGGAAACACC   |
| 22    | Synthetic      | 2011/2100 | 3136-2125         | 1012bp | as   | ccatggAACAAGACCATCCTGGACCTG       | agatctAACAGAAGGTGGGCTCCTGC      |
| 23    | G <sub>F</sub> | 1214/1215 | 14-1786           | 1773bp | s    | agatctCCATCTTCAGCTCCAGACAG        | ccatggCTGGCAATCTCTGGAGTTAG      |
| 24    | G <sub>F</sub> | 2031/1797 | 2150-1801         | 350bp  | as   | ccatggCGTAAGAATCTACTAACAGAAG      | agatctGAGTTTCTTTATTGTGTCTACTTCC |
| 25    | G <sub>F</sub> | 1218/1219 | 2648-2125         | 524bp  | as   | ccatggGGAAGTAGACACAATAAAGAAAACCTC | agatctCTGGTGAATTCTGATAGGCTTG    |
| 26    | G <sub>F</sub> | 1218/1220 | 2823-2125         | 699bp  | as   | ccatggGGAAGTAGACACAATAAAGAAAACCTC | agatctTTCGTGGAGAGATAATGCGTG     |
| 27    | G <sub>F</sub> | 1218/1221 | 3136-2125         | 1012bp | as   | ccatggGGAAGTAGACACAATAAAGAAAACCTC | agatctCCTTTCATTCTGAGGTAGTGTC    |
| 28    | F              | 2036/1797 | 2150-1801         | 350bp  | as   | ccatggGAGATTACAAGATGGTGAAGG       | agatctGAGTTTCTTTATTGTGTCTACTTCC |
| 29    | F              | 2036/1219 | 2648-1801         | 848bp  | as   | agatctGAGTTTCTTTATTGTGTCTACTTCC   | agatctCTGGTGAATTCTGATAGGCTTG    |
| 30    | F              | 1218/1219 | 2648-2125         | 524bp  | as   | ccatggGGAAGTAGACACAATAAAGAAAACCTC | agatctCTGGTGAATTCTGATAGGCTTG    |
| 31    | F              | 1218/1220 | 2823-2125         | 699bp  | as   | ccatggGGAAGTAGACACAATAAAGAAAACCTC | agatctTTCGTGGAGAGATAATGCGTG     |

|    |         |           |           |        |    |                                    |                                  |
|----|---------|-----------|-----------|--------|----|------------------------------------|----------------------------------|
| 32 | F       | 1218/1221 | 3136-2125 | 1012bp | as | cctatggGGAAGTAGACACAATAAAGAAAAC TC | agatctCCTTTCATTCTGAGGTAGTGTC     |
| 33 | A       | 2032/1797 | 2150-1801 | 350bp  | as | cctatggCGTAAGAATCCTACTAACAGAAATC   | agatctGAGTTTTCTTTATTGTGTCTACTTCC |
| 34 | A       | 1218/2138 | 2823-2125 | 699bp  | as | cctatggGGAAGTAGACACAATAAAGAAAAC TC | aacgcgtTTCGTGGAAGATATTGTGTG      |
| 35 | A       | 1218/2137 | 3136-2125 | 1012bp | as | cctatggGGAAGTAGACACAATAAAGAAAAC TC | aacgcgtCCTTTCACCTGAGGTAGTGTC     |
| 36 | recoded | 4320/4321 | 2823-2125 | 699bp  | as | cctatggAGAGGTTGATACGATTA AAAAGACGC | agatctTTTGTTGAAAGGTAGTGTA        |

(B) Additional oligonucleotides used in this study.

|         |                                      |                                                                  |
|---------|--------------------------------------|------------------------------------------------------------------|
| DES837  | TAATACGACTCACTATAGGG                 | 3' sequencing primer for pTriplEX phage library (BD Biosciences) |
| DES886  | AAGCGCGCCATTGTGTTGG                  | 5' sequencing primer for pTriplEX phage library (BD Biosciences) |
| DES1141 | GTAAAACGACGGCCAGTTTTTTTTTTTTTTTTT    | M13(-20) and oligo-d(T), to prime cDNA from poly(A) mRNA         |
| DES1165 | CAATACAAGAACGGGAACAAC                | L1 ORF2; paired with DES1166, nt 2858-2878, screen phage library |
| DES1166 | ACCTTTGATGAGAATGAAGTGTC              | L1 ORF2; paired with DES1165, nt 3269-3247 (AS)                  |
| DES1167 | ACTAACAGGAACCAAGACCAC                | L1 ORF1; paired with DES1168, nt 1814-1834, screen phage library |
| DES1168 | GTTTCATTCCATCACCTGTTTGTATG           | L1 ORF1; paired with DES1167, nt 2101-2076 (AS)                  |
| DES1249 | TCGGAGGGCGAAGAATC                    | Hygromycin resistance gene, forward                              |
| DES1250 | GTTGGCGACCTCGTATTG                   | Hygromycin resistance gene, reverse                              |
| DES1256 | GACTTGTAACTCTTTAGCAGT                | L1 ORF1, nt 2011-1991 (AS)                                       |
| DES1847 | AACAACACCCTGCTGAACG                  | smL1 ORF2, nt 3720-3738                                          |
| DES1848 | TGGGTGGTCAGGCTACTA                   | smL1 ORF2, nt 3922-3905 (AS)                                     |
| DES1947 | GGAAATGAACAAAACCATAGACC              | L1 ORF1, nt 2092-2117                                            |
| DES2784 | CCTTCTTCTCAGCACCTC                   | L1 ORF2, nt 3538-3555                                            |
| DES2790 | GCTCTCTCCCGTTTTTCTTG                 | L1 ORF2, nt 3898-3878 (AS)                                       |
| DES2879 | aagcggccgcTTCGTGGAGAGATAATGCGTG      | NotI + L1 ORF1, nt 2823-2803 (AS)                                |
| DES2880 | aagcggccgcGAGTTTTCTTTATTGTGTCTACTTCC | NotI + L1 ORF1, nt 2150-2125 (AS)                                |
| DES2881 | aaggatccATTAGTCTGAACAGGTGAGAGG       | BamHI + L1 ORF1, nt 1286-1307                                    |
| DES2882 | aaggatccTAAGAGAGCTTGCCAGCAGA         | BamHI + L1 ORF1, nt 1636-1655                                    |
| DES3062 | TCGGTCGCCGCATACACTAT                 | <i>TEM1</i> reporter gene, forward                               |
| DES3063 | GCAACTTTATCCGCCTCCATC                | <i>TEM1</i> reporter gene, reverse                               |
| DES3353 | AAACATACAAACAGGTGATGGAAATG           |                                                                  |
| DES3354 | AATTGTTGCTTCCTGTTATTTTAGTTG          | recoded L1 ORF1 (pJL3), nt 2073-2098                             |
| DES3818 | gggatccTGGAACAGGCAGAAGCACAG          | recoded L1 ORF1 (pJL3), nt 2982-2956 (AS)                        |
| DES3819 | gggatccTGACCAACCGCAACCAGGAC          | BamHI + smL1 ORF1, nt 1120-1140                                  |
| DES3820 | ggctagcAGGTCCAGGATGGTCTTGTTT         | BamHI + smL1 ORF1, nt 1812-1831                                  |
| DES3821 | ggctagcTTGGTCTTGTCGTGGAACACC         | NheI + smL1 ORF1, nt 2119-2098 (AS)                              |
|         |                                      | NheI + smL1 ORF1, nt 2800-2779 (AS)                              |

Table S2. **Identification of AS L1 RIFTs.****(A) AS L1 fusion transcripts isolated from a mouse testis phage library.**

Chromosomal coordinates were based on the B6 reference genome, mm8 release. Transcripts that were initiated by polymorphic L1s, absent from the reference genome, were highlighted (*bold, italicized type*). Fusion transcript 2AS1-1 was expressed in the opposite orientation to AK155723. Some RIFTs already have been reported (1). L1 subfamilies were defined by RepeatMasker and have not been re-classified here, despite some known discrepancies in classifications (1). RIFTs bearing multiple names were identified independently, more than once.

| fusion transcript name                | GenBank acc. no. | chr. | L1 start coordinate | L1 stop coordinate | L1 subfamily | L1 orien. | fusion transcript span in genome, nt | overlapping cognate gene | GenBank acc. no.   | ESTs overlapping with L1 | gene orien. | L1 location in gene | L1 AS fusion transcript coding | start of transcript in L1spa | stop of transcript in L1spa | orientation of transcript vs. native (overlapping) transcript | orientation of transcript vs. L1 template | transcript spliced | other comments                        |
|---------------------------------------|------------------|------|---------------------|--------------------|--------------|-----------|--------------------------------------|--------------------------|--------------------|--------------------------|-------------|---------------------|--------------------------------|------------------------------|-----------------------------|---------------------------------------------------------------|-------------------------------------------|--------------------|---------------------------------------|
| <b>IASIII</b>                         | EF591873         | 8    | EF591880            |                    | TF           | +         | 42,649                               | N/A                      |                    |                          |             |                     | ATG in AS L1                   | 2241                         | 1845                        | N/A; novel transcript                                         | antisense                                 | yes                | polymorphic L1 template               |
| 2ASI-1                                | EU233991         | 4    | 73300011            | 73306261           | TF           | -         | 5,002                                |                          | AK155723           | CR517799                 | -           | ?                   | ATG in AS L1                   | 2228                         | 1855                        | AS to AK155723                                                | antisense                                 | yes                |                                       |
| 4ASIII-1                              | EU233992         | 7    | 6546454             | 6552141            | F2           | -         | 17,224                               | Usp29                    | NM_021323          |                          | +           | intron6             | Usp29                          | 2190                         | 1881                        | sense                                                         | antisense                                 | yes                |                                       |
| <b>4ASIII2-1</b><br><b>4ASI-1</b>     | EF591876         | 13   | EF591881            |                    | TF           | -         | 75,580                               | AK129128                 | NM_001081352       |                          | +           | intron6             | ATG in AS L1                   | 2228                         | 1859                        | sense                                                         | antisense                                 | yes                |                                       |
| 4ASIII4-2<br>Testisunspliced          | EU234045         | 5    | 18957464            | 18961201           | F/F2         | +         | 2,845                                | ENSMUST00000088516.2     |                    |                          | +           | intron              | no; unspliced                  | 1593                         | 2023                        | sense                                                         | sense                                     | no                 | not initiated in L1; terminated in L1 |
| 5ASI-1                                | EU233993         | 1    | 145473276           | 145479405          | TF           | -         | 30,463                               | Glxr2                    | NM_001038593       |                          | +           | upstream            | yes                            | 2081                         | 1839                        | sense                                                         | antisense                                 | yes                |                                       |
| 5ASII                                 | EF591872         | 2    | 66106852            | 66112228           | GF           | +         | 30,052                               | Scn1a                    | NM_018733          |                          | -           | intron1             | ATG in AS L1                   | 2223                         | 1859                        | sense                                                         | antisense                                 | yes                |                                       |
| 5ASIII3-1                             | EU233994         | 13   | 105021323           | 105026446          | F            | +         | 81,840                               | ErbB2ip                  | NM_021563          |                          | -           | intron1             | yes                            | 2221; 2036                   | 2080; 1785                  | sense                                                         | antisense                                 | yes                |                                       |
| 6ASIII3-1<br>Testisunspliced          | EU234041         | 12   | 94489362            | 94495492           | TF           | -         | 1,409                                |                          |                    |                          | +           |                     | ATG in AS L1                   | 2197                         | 1433                        | N/A; novel transcript                                         | antisense                                 | no                 |                                       |
| 7ASIII                                | EU233995         | 13   | 8036636             | 8041441            | GF           | +         | 14,522                               |                          | AK139843; AK141993 |                          |             |                     | ATG in AS L1                   | 2221                         | 1859                        | AS to AK139843; AS to AK141993                                | antisense                                 | yes                |                                       |
| 7ASIII2-1 A                           | EF591875         | 12   | 78323703            | 78330141           | TF           | -         | 65,845                               | Fut8                     | NM_016893          |                          | +           | intron6             | ATG in AS L1                   | 2187                         | 1893                        | sense                                                         | antisense                                 | yes                |                                       |
| 7ASIII2-1 B                           | EF591874         | 12   | 78302248            | 78308516           | TF           | -         | 87,022                               | Fut8                     | NM_016893          |                          | +           | intron5             | yes                            | 1998                         | 1839                        | sense                                                         | antisense                                 | yes                |                                       |
| 7ASIII4-1<br>Testisunspliced          | EU234044         | 14   | 123141801           | 123146971          | A            | +         | 2,270                                | Fgf14b                   | NM_207667          |                          | -           | intron              | unspliced                      | 1593                         | 2278                        | AS                                                            | sense                                     | no                 | not initiated in L1; terminated in L1 |
| 7ASIII4-2                             | EF591871         | 2    | 43990003            | 43996650           | TF           | -         | 213,429                              | Arhgap15                 | NM_153820          |                          | +           | intron9             | ATG in AS L1                   | 2224                         | 1838                        | sense                                                         | antisense                                 | yes                |                                       |
| <b>8ASI-1</b>                         | EF591877         | 13   | EF591882            |                    | TF           | +         | 59,553                               | Parp8                    | BC021881           |                          | -           | intron6             | yes                            | 2211                         | 1890                        | sense                                                         | antisense                                 | yes                |                                       |
| 9ASI-1                                | EF591879         | 16   | 95119882            | 95126090           | TF           | -         | 48,719                               |                          |                    |                          |             |                     | ATG in AS L1                   | 2179                         | 1893                        | N/A; novel transcript                                         | antisense                                 | yes                |                                       |
| 11ASI-1                               | EU233997         | 16   | 48882642            | 48888091           | GF           | +         | 35,408                               | Dzip3                    | NM_027964          |                          | -           | intron8             | ATG in AS L1                   | 2238                         | 1892                        | sense                                                         | antisense                                 | yes                |                                       |
| <b>11ASIII</b><br><b>2ASIII</b>       | EF591878         | 15   | EF591883            |                    | TF           | -         | 56,583                               | Rnasen                   | NM_026799          |                          | +           | intron11            | ATG in AS L1                   | 2225                         | 1893                        | sense                                                         | antisense                                 | yes                |                                       |
| 10ASI-1                               | EU233996         | 2    | 83731030            | 83736749           | F            | +         | 16,622                               | Zswim2                   | NM_027964          |                          | -           | intron3             | ATG in AS L1                   | 2240; 1984                   | 2073; 1839                  | sense                                                         | antisense                                 | yes                |                                       |
| 12ASII                                | EU233998         | 1    | 107395525           | 107400953          | GF           | +         | 186,866                              | Pign                     | NM_013784          |                          | -           | intron21            | ATG in AS L1                   | 2202                         | 1839                        | sense                                                         | antisense                                 | yes                | see also CRL2196C02                   |
| 70-8-1<br>10ASIII4-2                  | EU233999         | 3    | 69007284            | 69011494           | F            | +         | 26,484                               | Ifi80                    | NM_026641          | AK019542                 | -           | intron13            | ATG in AS L1                   | 2206; 2036; 1999             | 2080; 2011; 1531            | sense                                                         | antisense                                 | yes                |                                       |
| 70-7-1<br>Testisunspliced<br>AK030137 | EU234040         | 9    | 117351284           | 117357098          | F/F2         | -         | 3,629                                | Rbms3                    | NM_178660          | AK030137                 | +           |                     | no; unspliced                  | 2220; 2036; 1999             | 2080; 2011; 1540            | AS to Rbms3 intron; sense to AK030137                         | antisense                                 | no                 |                                       |
| 70-9-2<br>Testisunspliced             | EU234043         | 7    | 104983758           | 104988672          | GF           | +         | 1,895                                |                          |                    |                          | -           |                     | unspliced                      | 1811                         | 1569                        | N/A; novel transcript                                         | antisense                                 | no                 |                                       |
| 90-6-2<br>Testisunspliced             | EU234042         | 12   | 94489362            | 94495492           | TF           | -         | 1,433                                | N/A                      |                    |                          |             |                     | spliced within L1              | 2221; 1748                   | 2085; 1433                  | N/A; novel transcript                                         | antisense                                 | yes                |                                       |

**Table S2. (B) L1 fusion transcripts isolated from a mouse thymus cDNA phage library.**

Chromosomal coordinates were based on the B6 reference, mm8 release. L1 fusion transcripts identified from screens of a mouse thymus phage cDNA library were cloned and sequenced. L1 subfamilies were defined by RepeatMasker ([www.repeatmasker.org](http://www.repeatmasker.org)) and have not been re-classified here (1). RIFTs bearing multiple names were identified independently, i.e. more than once. 61E and 21-4-1 are spliced AS L1 RIFTs. 21-3-2 and 21-1-2 are unspliced AS L1 RIFTs. Remaining transcripts were unspliced, sense-stranded cDNAs containing ORF1 sequences.

| fusion transcript name          | GenBank acc. no. | chr. | L1 start coordinate | L1 stop coordinate | L1 subfamily | L1 orien. | fusion transcript span in genome, nt | overlapping cognate gene | GenBank accession no. | ESTs overlapping with L1      | gene orien. | L1 location in gene | fusion transcript coding | start of transcript in L1spa | stop of transcript in L1spa | orientation of transcript vs. native (overlapping) transcript | orientation of transcript vs. L1 template | other comments                                                                                           |
|---------------------------------|------------------|------|---------------------|--------------------|--------------|-----------|--------------------------------------|--------------------------|-----------------------|-------------------------------|-------------|---------------------|--------------------------|------------------------------|-----------------------------|---------------------------------------------------------------|-------------------------------------------|----------------------------------------------------------------------------------------------------------|
| 61EThymus                       | EU234002         | 19   | 33626423            | 33631583           | GF           | +         | 6,307                                | AI747699                 | AK170332              | partial overlap with AK135585 | -           | intron7             | yes                      | 2308                         | 1531 (1479)                 | sense                                                         | antisense                                 | unspliced in L1 and flanking genomic sequences; spliced in downstream exons                              |
| 21-4-1Thymus                    | EU234003         | 10   | 57961513            | 57967477           | F2           | -         | 5,311                                | BC042726                 | BC042726              |                               | +           | intron4             | yes                      | 2649                         | 1587                        | sense                                                         | antisense                                 | unspliced; sequences in intron of spliced gene                                                           |
| 21-3-2 Thymusunspliced          | EU234046         | 13   | 105021323           | 105026446          | F            | +         | 4,861                                | Erb2ip                   | NM_021563             | partial overlap with AK142040 | -           | intron1             | no                       | 3577                         | 1531                        | sense                                                         | antisense                                 | unspliced; sequences in introns of spliced gene                                                          |
| 21-1-2 Thymusunspliced          | EU234047         | Y    | 456407              | 462013             | F            | +         | 4,820                                | Uty                      | BC053061              |                               | -           | intron22            | no                       | 5106                         | 1540                        | sense                                                         | antisense                                 | unspliced; sequence entirely within intron of spliced gene; unusual promoter site within L1              |
| 61B Thymusunspliced             | EU234048         | 15   | 42474518            | 42481162           | TF           | -         | 3,648                                | Angpt1                   | NM_009640             |                               | -           | intron1             | no                       | 609; 910                     | 697; 2059                   | sense                                                         | sense                                     | unspliced; sequence in intron of spliced gene; promoter outside of L1; terminates in L1                  |
| (22-1-2) 26-2-1 Thymusunspliced | EU234049         | 18   | 5725792             | 5731219            | F2/A         | +         | 2,488                                | Zfx1a                    | NM_011546             |                               | +           | intron2             | no                       | 1593                         | 2849                        | sense                                                         | sense                                     | unspliced; sequence in intron of spliced gene; transcript entirely within L1                             |
| 22-2-2 Thymusunspliced          | EU234050         | 18   | 64036600            | 64041808           | GF           | +         | 1,666                                | WDR7 homolog             | AK154451              |                               | +           | intron21            | yes                      | 427; 1470                    | 550; 2057                   | sense                                                         | sense                                     | unspliced; sequence in intron of spliced gene promoter outside of L1; terminates in L1                   |
| 26-5-2 Thymusunspliced          | EU234051         | 2    | 37852416            | 37857621           | F            | +         | 5,633                                | Dennd1a                  | NM_146122             | AK038066                      | -           | intron8             | no                       | 1344                         | 2300                        | antisense                                                     | sense                                     | unspliced; sequence in intron of spliced gene; promoter outside of L1; terminates in L1; no poly(A) tail |
| 59B Thymusunspliced             | EU234052         | 9    | 55523029            | 55525579           | GF           | -         | 2,400                                | AK173175<br>AK048755     | NM_001081<br>341      |                               | -           | intron22            | yes                      | 1823; 2081                   | 2015; 2856                  | sense                                                         | sense                                     | unspliced; sequence in intron of spliced gene promoter outside of L1; terminates in L1                   |
| 61C Thymusunspliced             | EU234053         | 6    | 33706217            | 33711587           | A            | +         | 2,399                                | Exoc4                    | AK039983              |                               | +           | intron11            | yes                      | 1540                         | 2856                        | sense                                                         | sense                                     | unspliced; sequence in intron of spliced gene; promoter outside of L1; terminates in L1                  |
| (63B) 65C Thymusunspliced       | EU234054         | 1    | 88606392            | 88611310           | GF           | +         | 1,719                                | 4930429A22<br>Rik        | AK031180              |                               | +           | intron5             | yes                      | 1540                         | 2848                        | sense                                                         | sense                                     | unspliced; sequence in intron of spliced gene; promoter outside of L1; terminates in L1                  |



**Table S2. (C) AS L1 fusion transcripts from cell line CRL2196 and/or B6 and DBA/2J testes identified by RT-PCR.**

Primers for RT-PCR were designed based on “typical” AS L1 RIFTs observed initially in phage library screens. Total RNA from adult testis was used for RT-PCR. Candidate fusion transcripts were cloned and sequenced. Several fusion transcripts were identified from genomic regions lacking annotated genes or expressed sequence tags (EST). Two clones (DBA 2A12 and DBA B08) initiated from polymorphic L1s present in DBA/2J, absent from the reference genome. AS L1 RIFTs bearing multiple names were identified independently more than once.

| fusion transcript name                   | GenBank accession no. | chr | L1 start coordinate | L1 stop coordinate | L1 subfamily | L1 orien. | fusion transcript span in genome, nt | overlapping cognate gene | GenBank accession no. | gene orien. | L1 location in gene        | fusion transcript coding | start of transcript in L1spa | stop of transcript in L1spa | orientation of transcript vs. native (overlapping) transcript | orientation of transcript vs. L1 template | fusion transcript splicing | other comments                                                                      |
|------------------------------------------|-----------------------|-----|---------------------|--------------------|--------------|-----------|--------------------------------------|--------------------------|-----------------------|-------------|----------------------------|--------------------------|------------------------------|-----------------------------|---------------------------------------------------------------|-------------------------------------------|----------------------------|-------------------------------------------------------------------------------------|
| CRL2196C02                               | EU234001              | 1   | 107395525           | 107400953          | GF           | +         | 47,812                               | Pign                     | AK132928              | -           | intron                     | yes                      | 2011; 1530                   | 1531; 1488                  | sense                                                         | antisense                                 | yes (also in L1)           | contains Lx in sense orientation (homologous to L1spa at 5819-6679); ATG in Lx      |
| CRL2196C10                               | EU234000              | 1   | 175854586           | 175859907          | A            | +         | 6,737                                | Hi205                    | NM_172648             | -           | Intron 4                   | yes                      | 1978                         | 1593                        | sense                                                         | antisense                                 | yes                        | Jonathan Keller                                                                     |
| AK015524B                                | EU234039              | 1   | 140932925           | 140939189          | TF           | -         | 48,802                               | BC042698/Dend1b          | NM_181347             | +           | intron10                   | ATG in AS L1             | 2221                         | 1864                        | sense                                                         | antisense                                 | yes                        |                                                                                     |
| B6 2B11                                  | EU234011              | 7   | 83659505            | 83664656           | GF           | +         | 8,394                                | 1700026 D08Rik           | NM_029335             | -           | Intron 4                   | ATG in AS L1             | 2011                         | 1835                        | sense                                                         | antisense                                 | yes                        |                                                                                     |
| B6 2C04                                  | EU234012              | 2   | 78748984            | 78755157           | A            | -         | 799                                  | N/A                      |                       | N/A         | N/A                        | ATG in AS L1             | 2011; 1889; 1633             | 1968; 1838; 1538            | N/A                                                           | antisense                                 | yes (also in L1)           |                                                                                     |
| B6 2C06                                  | EU234013              | 1   | 24908585            | 24909777           | F            | +         | 1,768                                |                          |                       | N/A         | N/A                        | yes                      | 2011                         | 1870                        | N/A                                                           | antisense                                 | yes                        |                                                                                     |
| B6 2D07                                  | EU234014              | 14  | 119878916           | 119885063          | A            | -         | 878                                  |                          |                       |             |                            | ATG in AS L1             | 2011; 1633                   | 1840; 1538                  | N/A                                                           | antisense                                 | yes (also in L1)           |                                                                                     |
| B6 2E10                                  | EU234015              | 18  | 44415203            | 44420652           | GF           | +         | 124,494                              | 9530002K18               | AK020535              | -           | 5' intergenic region       | ATG in AS L1             | 2009                         | 1873                        | sense                                                         | antisense                                 | yes                        | some ASL1 fusion transcript exons are novel; others shared with 9530002K18Rik       |
| B6 B06                                   | EU234016              | 17  | 89660065            | 89665291           | L1VL1        | +         | 50,630                               | N/A                      |                       | N/A         | N/A                        | ATG in AS L1             | 2011                         | 1878                        | N/A                                                           | antisense                                 | yes                        |                                                                                     |
| B6 B05                                   | EU234017              | 15  | 61112866            | 61119031           | F2           | -         | 105,062                              | AK132805                 | AK132805              |             | N/A                        | yes                      | 2011; 1889                   | 1968; 1836                  | sense                                                         | antisense                                 | yes (also in L1)           | overlap with AK132805                                                               |
| B6 B07<br>B6 C01<br>B6 C01<br>DBA2D06    | EU234018              | 9   | 20105039            | 20110504           | GF           | +         | 1,666                                | Zfp560                   | AK141494; AK009475    | -           | Intron 1                   | ATG in AS L1             | 2011                         | 1839                        | sense                                                         | antisense                                 | yes                        |                                                                                     |
| B6 C02                                   | EU234019              | 4   | 112323142           | 112329580          | L1_Mus1      | -         | 17,878                               | Skint5                   | NM_001103199.1        | -           | 2 splices in L1            | yes                      | 2057; 2000                   | 2043; 1968                  | antisense                                                     | antisense                                 | yes (also in L1)           | exons overlap with Skint5 introns (AS)                                              |
| B6 C03                                   | EU234020              | 13  | 108552699           | 108554171          | GF           | +         | 6,482                                |                          |                       |             |                            |                          | 2011                         | 1841                        | N/A                                                           | antisense                                 | yes                        |                                                                                     |
| B6 E02                                   | EU234021              | 13  | 101218004           | 101223936          | A            | -         | 14,489                               | Snn1                     | BC045158              | +           | upstream                   | yes                      | 2011                         | 1835                        | sense                                                         | antisense                                 | yes                        |                                                                                     |
| B6 E07                                   | EU234022              | 16  | 77728359            | 77729431           | F2           | -         | 6,480                                |                          |                       |             |                            |                          | 2011                         | 1836                        | N/A                                                           | antisense                                 |                            |                                                                                     |
| DBA C07                                  | EU234023              | 6   | 123097691           | 123104052          | A            | -         | 6,488                                | Clec4a2                  | NM_011999             | +           | Intron 3                   | ATG in AS L1             | 2011                         | 1910                        | sense                                                         | antisense                                 | yes                        |                                                                                     |
| DBA C02                                  | EU234024              | 16  | 77728359            | 77729431           | F2           | -         | 6,442                                |                          |                       |             |                            | ATG in AS L1             | 2011                         | 1836                        | N/A                                                           | antisense                                 | yes                        |                                                                                     |
| DBA C05                                  | EU234037              | 13  |                     |                    |              |           |                                      |                          |                       |             |                            | ATG in AS L1             | 2011                         | 1839                        | N/A                                                           | ?(polymorphic L1?)                        | yes                        | possibly spliced transcript switching order of exons; or polymorphic L1 in DBA/2J   |
| DBA B10                                  | EU234025              | 18  | 70613427            | 70619844           | A            | -         | 7,152                                | Stard6                   | NM_029019             | +           | Intron 6 (2 splices in L1) |                          | 2011; 1889                   | 1968; 1838                  | sense                                                         | antisense                                 | yes (also in L1)           |                                                                                     |
| DBA A06<br>DBA 2A04                      | EU234026              | 8   | 132024756           | 132031387          | TF           | -         | 34,271                               | 1700008F21 Rik           | NM_029292             | +           | Intron 5                   | ATG in AS L1             | 2011                         | 1869                        | sense                                                         | antisense                                 | yes                        |                                                                                     |
| DBA A11                                  | EU234027              | 4   | 92557585            | 92563957           | F3           | -         | 17,878                               |                          |                       |             |                            | ATG in AS L1             | 2011                         | 1881                        | sense but minimally overlapping                               | antisense                                 | yes                        | minimal overlap with exon from AK149399                                             |
| DBA D11<br>DBA C12<br>DBA B09<br>DBA D10 | EU234028              | 6   | 123097691           | 123104052          | A            | -         | 5,004                                | Clec4a2                  | BC006623; NM_011999   | +           | Intron 3                   | ATG in AS L1             | 2011                         | 1881                        | sense                                                         | antisense                                 | yes                        |                                                                                     |
| DBA A02                                  | EU234029              | 3   | 102961728           | 102967399          | GF           | +         | 19,633                               | Sypc1                    | NM_011516             | -           | Intron 30                  | ATG in AS L1             | 2011                         | 1892                        | sense                                                         | antisense                                 | yes                        |                                                                                     |
| DBA 2E01                                 | EU234030              | 11  | 54224849            | 54231970           | TF           | -         | 36,295                               | BC107369                 | BC107369              | +           | Intron 3                   | ATG in AS L1             | 2011                         | 1892                        | sense                                                         | antisense                                 | yes                        |                                                                                     |
| DBA 2C06                                 | EU234031              | 13  | 78776733            | 78780209           | A            | -         | 3,746                                | AK133349                 | AK133349              | +           | 2 splices in L1            | spliced AK133349         | 2011                         | 1869                        | sense                                                         | antisense                                 | yes (also in L1)           | overlap with AK133349 which is unspliced                                            |
| DBA 2C05                                 | EU234032              | 8   | 82655830            | 82662260           | TF           | -         | 15,586                               | Anapc10                  | NM_026904             | +           | Intron 4                   | ATG in AS L1             | 2011                         | 1839                        | sense                                                         | antisense                                 | yes                        |                                                                                     |
| DBA 2A03                                 | EU234033              | 16  | 62038151            | 62040456           | A/F2         |           | 7,469                                |                          |                       |             |                            | ATG in AS L1             | 2011                         | 1868                        | N/A                                                           | antisense                                 | yes                        |                                                                                     |
| DBA 2A12                                 | EU234034              | 9   |                     |                    |              |           |                                      |                          |                       |             |                            | ATG in AS L1             | 2011                         | 1888                        | N/A                                                           | ?(polymorphic L1?)                        | yes                        |                                                                                     |
| DBA 2B08                                 | EU234035              | 10  | 17714696            | 17717225           | F            | +         | 14,850                               | (3110003A17 Rik)         | NM_028440             | -           | 5' intergenic region       | yes                      | 2136; 2035                   | 2078; 1969                  | sense                                                         | antisense                                 | yes                        |                                                                                     |
| DBA 2D08                                 | EU234036              | X   | 42871189            | 42873888           | A            | +         | 11,829                               |                          |                       |             |                            | yes                      | N/A                          | N/A                         | N/A                                                           | antisense                                 | yes (also in L1)           |                                                                                     |
| DBA B08                                  | EU234038              | 11  |                     |                    |              |           |                                      | B3gnt1                   | NM_016888             | -           |                            | ATG in AS L1             | 2011                         | 1888                        | antisense (nonoverlapping)                                    | ?(polymorphic L1?)                        | yes                        | exons overlap with AS B3gnt1 introns                                                |
| Ubc3a fusion                             | EU234010              | 7   | 59162403            | 59168136           | TF           | -         | 3,064                                | Ubc3a                    | NM_011668             | +           | intron11                   | yes                      | 1957                         | 1892                        | sense                                                         | antisense                                 | yes                        |                                                                                     |
| Suc1g2 fusion                            | EU234009              | 6   | 95623528            | 95629210           | GF           | +         | 181,456                              | Suc1g2                   | NM_011507             | -           | intron1                    | ATG in AS L1             | 1957                         | 1892                        | sense                                                         | antisense                                 | yes                        | integrant (pseudogene) at chrX:152355677-152358910; good example of fusion proteins |
| Here2 fusion                             | EU234008              | 7   | 55943138            | 55949786           | TF           | -         | 146,820                              | Here2                    | NM_010418             | +           | intron4                    | ATG in AS L1             | 1957                         | 1893                        | sense                                                         | antisense                                 | yes                        | overlap of L1 exon and gene exon 3' sequences                                       |
| Fgf17 fusion                             | EU234007              | 16  | 28106394            | 28111820           | GF           | +         | 29,517                               | Fgf12                    | NM_010199             | -           | intron4                    | ATG in AS L1             | 1957                         | 1892                        | sense                                                         | antisense                                 | yes                        |                                                                                     |
| Amph fusion                              | EU234004              | 13  | 19066760            | 19073230           | TF           | -         | 73,582                               | Amph                     | NM_175007             | +           | intron2                    | ATG in AS L1             | 1957                         | 1886                        | sense                                                         | antisense                                 | yes                        |                                                                                     |
| Antxr2 fusion                            | EU234005              | 5   | 98229028            | 98235131           | GF           | +         | 105,593                              | Antxr2                   | NM_133738             | -           | intron7                    | ATG in AS L1             | 1920                         | 1845                        | sense                                                         | antisense                                 | yes                        |                                                                                     |
| Car8 fusion                              | EU234006              | 4   | 8118895             | 8124119            | GF           | +         | 51                                   | Car8                     | NM_007592             | -           | intron 3                   | ATG in AS L1             | 1957                         | 1891                        | sense                                                         | antisense                                 | yes                        |                                                                                     |

Table S2. (D) **Computational identification of L1 fusion transcripts as full-length RIKEN ESTs.**

Transcripts in public mouse EST libraries were identified by BLASTN alignments; see text for details. Unannotated clones lacked information about overlapping cognate genes. All transcripts identified in this table were spliced. The highlighted clones (*gray*) are 17 clones originally identified by Zemojtel et al., 2007 (2).

| RIKEN clones | Chr. | start (mm8) | stop (mm8) | L1 subfamily | L1spa start | L1spa stop | L1 orien. | fusion transcript span in genome, nt | overlapping cognate gene | Genbank accession | encoded protein | tissue | gene orien. | L1 location within gene |
|--------------|------|-------------|------------|--------------|-------------|------------|-----------|--------------------------------------|--------------------------|-------------------|-----------------|--------|-------------|-------------------------|
| AK015008     | 10   | 111571425   | 111578851  | L1Md_T       | 2242        | 1837       | -         | 43,142                               | Caps2                    | NM_178278         | BAC25455        | testis | +           | intron3                 |
| AK007235     | 8    | 96368470    | 96374755   | L1Md_T       | 2205        | 1839       | -         | 7,556                                | Ces7                     | NM_001003951      | BAB24908        | testis | +           | upstream                |
| AK015524     | 1    | 140932925   | 140939189  | L1Md_T       | 2221        | 1893       | -         | 48,802                               | BC042698                 | NM_181347         | BAB29881        | testis | +           | intron10                |
| AK015778     | 11   | 11526694    | 11531497   | L1Md_F       | 2228        | 1839       | +         | 38,602                               |                          |                   |                 | testis |             |                         |
| AK131682     | 11   | 11526694    | 11531497   | L1Md_F       | 2242        | 1839       | +         | 4,117                                |                          |                   |                 | testis |             |                         |
| AK015845     | 3    | 142962687   | 142968944  | L1Md_F2      | 2202        | 1839       | -         | 10,139                               |                          |                   |                 | testis |             |                         |
| AK016072     | 16   | 75835067    | 75840241   | L1Md_Gf      | 2228        | 1838       | +         | 94,076                               | Samsn1                   | NM_023380         | P57725          | testis | -           | upstream                |
| AK132741     | 12   | 90764000    | 90770216   | L1Md_F2      | 2188        | 1837       | -         | 3,427                                |                          |                   |                 | testis |             |                         |
| AK132928     | 1    | 107395525   | 107400953  | L1Md_Gf      | 2228        | 1839       | +         | 48,020                               | Pign                     | NM_013784         | Q9R1S3          | testis | -           | intron21                |
| AK161293     | 6    | 57557930    | 57564107   | L1Md_T       | 2206        | 1838       | -         | 29,470                               |                          |                   |                 | testis |             |                         |
| AK135585     | 19   | 33626423    | 33631583   | L1Md_Gf      | 2221        | 1839       | +         | 5,960                                |                          |                   |                 | testis |             |                         |
| CA463860     | 12   | 34351760    | 34357164   | L1Md_Gf      | 2215        | 1838       | +         | 1,700                                |                          |                   |                 | testis |             |                         |
| BB614971     | 18   | 7465319     | 7466485    | L1Md_F       | 2228        | 1937       | +         | 17,689                               | Mpp7                     | NM_001081287      | NP_001074756    | testis | -           | intron4                 |
| BB615298     | 8    | 46081938    | 46088182   | L1Md_T       | 2228        | 1839       | -         | 3,012                                |                          |                   |                 | testis |             |                         |
| CF106266     | 14   | 80130384    | 80134274   | L1Md_A       | 2132        | 1839       | +         | 87,235                               |                          |                   |                 | testis |             |                         |
| AK015266     | 10   | 44426542    | 44431581   | L1Md_Gf      | 2194        | 1570       | +         | 8,132                                |                          |                   |                 | testis |             |                         |
| AK015267     | 5    | 45249224    | 45255386   | L1Md_F2      | 2226        | 1838       | -         | 12,508                               |                          |                   |                 | testis |             |                         |
| AK015548     | 12   | 66100620    | 66101658   | L1Md_F       | 2221        | 1841       | -         | 4,008                                |                          |                   |                 | testis |             |                         |
| AK076999     | 4    | 30595576    | 30601899   | L1Md_F2      | 2226        | 1540       | -         | 91,777                               |                          |                   |                 | testis |             |                         |
| AK015559     | 1    | 24908585    | 24909777   | L1Md_F       | 2235        | 224        | +         | 1,159                                |                          |                   |                 | testis |             |                         |
| AK077067     | 13   | 78776733    | 78780209   | L1Md_A       | 2233        | 1540       | -         | 3,943                                |                          |                   |                 | testis |             |                         |
| AK006905     | 18   | 70635500    | 70640669   | L1Md_Gf      | 2221        | 1839       | +         | 2,366                                | Poli                     | NM_011972         | Q6R3M4          | testis | -           | intron9                 |
| AK076828     | 13   | 76351495    | 76353381   | L1VL1        | 2163        | 2116       | +         | 13,655                               | Rhobtb3                  | NM_028493         | Q9CTN4          | testis | -           | intron8                 |

Table S2. (E) **Additional mouse ESTs containing AS L1 sequences in 5' ends**. A subset of EST clones included spliced exons but no splicing within L1 sequences (*highlighted in yellow*). These transcripts were identified from public mouse EST libraries by BLASTN alignments; see text for details. Unannotated clones lacked information about overlapping cognate genes.

| RIKEN fusion transcript, GenBank acc. no. | chr. | Description                                                                                                               | clone ID no.  | sequenced | subfamily | L1 length, nt |
|-------------------------------------------|------|---------------------------------------------------------------------------------------------------------------------------|---------------|-----------|-----------|---------------|
| CJ067403                                  | 13   | RIKEN full-length enriched mouse cDNA library, C57BL/6J 8 cells embryo 8 cells Mus musculus cDNA clone E860002103 5-      | E860002103    | 5, 3 end  | L1VL1     | 4254          |
| BB622436                                  | 16   | RIKEN full-length enriched, adult male olfactory brain Mus musculus cDNA clone 6430404D24 5-                              | 6430404D24    | AK032159  | L1VL1     | 5263          |
| BB655922                                  | 14   | RIKEN full-length enriched, 12 days embryo spinal ganglion Mus musculus cDNA clone D130046G19 5-                          | D130046G19    | AK051402  | L1VL1     | 1715          |
| BB616604                                  | 12   | RIKEN full-length enriched, adult male testis Mus musculus cDNA clone 4932422P09 5-                                       | 4932422P09    | 5, 3 end  | L1VL1     | 2999          |
| BB609902                                  | 5    | RIKEN full-length enriched mouse cDNA library, C57BL/6J lung male adult Mus musculus cDNA clone 1200008123 5-             | 1200008123    | 5, 3 end  | L1VL2     | 1066          |
| CJ162777                                  | 9    | RIKEN full-length enriched mouse cDNA library, Rathke-s pouches 14.5 days embryo Mus musculus cDNA clone M130004H22 5-    | M130004H22    | 5, 3 end  | F2        | 6293          |
| AA789378                                  | 13   | vv93e11.r1 Stratagene mouse skin (#937313) Mus musculus cDNA clone IMAGE:1229996 5-                                       | IMAGE1229996  | 5, 3 end  | F2        | 6210          |
| CJ046686                                  | 6    | RIKEN full-length enriched mouse cDNA library, C57BL/6J testis male adult Mus musculus cDNA clone 4921526E09 5-           | 4921526E09    | AK132683  | F2        | 5934          |
| CJ058240                                  | 10   | RIKEN full-length enriched mouse cDNA library, C57BL/6J thymus 0 day neonate Mus musculus cDNA clone A430102J02 5-        | A430102J02    | 5, 3 end  | F2        | 6224          |
| CJ046787                                  | 9    | RIKEN full-length enriched mouse cDNA library, C57BL/6J testis male adult Mus musculus cDNA clone 4922504A12 5-           | 4922504A12    | AK132735  | F2        | 6293          |
| BB616227                                  | 4    | RIKEN full-length enriched, adult male testis Mus musculus cDNA clone 4931422A14 5-                                       | 4931422A14    | AK076999  | F2        | 6324          |
| BB616730                                  | 2    | RIKEN full-length enriched, adult male testis Mus musculus cDNA clone 4932434A08 5-                                       | 4932434A08    | 5, 3 end  | F2        | 6159          |
| BB616883                                  | 9    | RIKEN full-length enriched mouse cDNA library, C57BL/6J testis male adult Mus musculus cDNA clone 4932702M09 5-           | 4932702M09    | AK030137  | F2        | 4714          |
| BY715427                                  | 2    | RIKEN full-length enriched, adult male testis Mus musculus cDNA clone 4930522P10 5-                                       | 4930522P10    | AK015873  | F3        | 5617          |
| CJ046771                                  | 13   | RIKEN full-length enriched mouse cDNA library, C57BL/6J testis male adult Mus musculus cDNA clone 4922503G03 5-           | 4922503G03    | AK132727  | F3        | 5964          |
| BB641970                                  | 10   | RIKEN full-length enriched, 10 days neonate cortex Mus musculus cDNA clone A830084P16 5-                                  | A830084P16    | AK044056  | F3        | 6200          |
| BB637513                                  | 13   | RIKEN full-length enriched, adult male aorta and vein Mus musculus cDNA clone A530081E06 5-                               | A530081E06    | AK041083  | F         | 820           |
| BY716756                                  | 19   | RIKEN full-length enriched, adult male testis Mus musculus cDNA clone 4933436E20 5-                                       | 4933436E20    | AK017078  | F         | 703           |
| BB615444                                  | 5    | RIKEN full-length enriched, adult male testis Mus musculus cDNA clone 4930509B07 5-                                       | 4930509B07    | AK132908  | F         | 1255          |
| BB645345                                  | 7    | RIKEN full-length enriched mouse cDNA library, C57BL/6J adipose male 4 days neonate Mus musculus cDNA clone B430110116 5- | B430110116    | AK046587  | F         | 2472          |
| BY714480                                  | 3    | RIKEN full-length enriched, adult male testis Mus musculus cDNA clone 4921524P20 5-                                       | 4921524P20    | AK019542  | F         | 4211          |
| BB641176                                  | 15   | RIKEN full-length enriched, 10 days neonate cortex Mus musculus cDNA clone A830009L17 5-                                  | A830009L17    | AK043579  | F         | 4127          |
| BY729029                                  | 1    | RIKEN full-length enriched, 7 days embryo whole body Mus musculus cDNA clone C430022K04 5-                                | C430022K04    | 5, 3 end  | F         | 3718          |
| BB614554                                  | 2    | RIKEN full-length enriched mouse cDNA library, C57BL/6J testis male adult Mus musculus cDNA clone 4921510119 5-           | 4921510119    | 5, 3 end  | F         | 1619          |
| BY714877                                  | 13   | RIKEN full-length enriched, adult male testis Mus musculus cDNA clone 4930435F18 5-                                       | 4930435F18    | AK015323  | F         | 1964          |
| BB614452                                  | 11   | RIKEN full-length enriched mouse cDNA library, C57BL/6J testis male adult Mus musculus cDNA clone 4932416O13 5-           | 4932416O13    | AK133208  | F         | 3863          |
| AW824969                                  | 13   | us09p03.y1 Soares_NMGBC_B-cell Mus musculus cDNA clone IMAGE:3166589 5-                                                   | IMAGE3166589  | 5, 3 end  | MusI      | 6223          |
| BB615657                                  | 15   | RIKEN full-length enriched mouse cDNA library, C57BL/6J testis male adult Mus musculus cDNA clone 4930542117 5-           | 4930542117    | AK132982  | MusI      | 6120          |
| BB641591                                  | 4    | RIKEN full-length enriched, 10 days neonate cortex Mus musculus cDNA clone A830034C17 5-                                  | A830034C17    | AK043797  | LX4B      | 3432          |
| BB616626                                  | 9    | RIKEN full-length enriched mouse cDNA library, C57BL/6J testis male adult Mus musculus cDNA clone 49324217 5-             | 49324217D17   | 5, 3 end  | A         | 4708          |
| BB646099                                  | 13   | RIKEN full-length enriched, 10 days neonate cerebellum Mus musculus cDNA clone B930009D02 5-                              | B930009D02    | AK080998  | A         | 5034          |
| BY306964                                  | 9    | RIKEN full-length enriched, 12.5 days embryo Rathke-s pouches Mus musculus cDNA clone K920012K13 5-                       | K920012K13    | 5, 3 end  | A         | 2769          |
| BY307063                                  | 9    | RIKEN full-length enriched, 12.5 days embryo Rathke-s pouches Mus musculus cDNA clone K920013C13 5-                       | K920013C13    | 5, 3 end  | A         | 2769          |
| CJ055932                                  | 2    | RIKEN full-length enriched mouse cDNA library, C57BL/6J cerebellum 16 days neonate Mus musculus cDNA clone 9630026B05 5-  | 9630026B05    | 5, 3 end  | A         | 6393          |
| BB641162                                  | 8    | RIKEN full-length enriched, 10 days neonate cortex Mus musculus cDNA clone A830008M02 5-                                  | A830008M02    | 5, 3 end  | A         | 6606          |
| BY715083                                  | 17   | RIKEN full-length enriched, adult male testis Mus musculus cDNA clone 4930470H14 5-                                       | 4930470H14    | AK015535  | A         | 5164          |
| BY716637                                  | 2    | RIKEN full-length enriched, adult male testis Mus musculus cDNA clone 4933427J07 5-                                       | 4933427J07    | AK016956  | A         | 3459          |
| BB648069                                  | X    | RIKEN full-length enriched, 16 days embryo head Mus musculus cDNA clone C130053F07 5-                                     | C130053F07    | AK048370  | A         | 6392          |
| BY715636                                  | 1    | RIKEN full-length enriched, adult male testis Mus musculus cDNA clone 4930545H10 5-                                       | 4930545H10    | AK016047  | A         | 1025          |
| BY716764                                  | 1    | RIKEN full-length enriched, adult male testis Mus musculus cDNA clone 4933436I20 5-                                       | 4933436I20    | AK016047  | A         | 1025          |
| BB573692                                  | 13   | RIKEN full-length enriched, adult male testis (DH10B) Mus musculus cDNA clone 4933400A22 5-                               | 4933400A22    | AK077067  | A         | 3477          |
| BB616797                                  | 13   | RIKEN full-length enriched, adult male testis Mus musculus cDNA clone 4932439N19 5-                                       | 4932439N19    | AK133349  | A         | 3477          |
| BB617027                                  | 18   | RIKEN full-length enriched mouse cDNA library, C57BL/6J testis male adult Mus musculus cDNA clone 4933412A06 5-           | 4933412A06    | AK030177  | A         | 1282          |
| BY715415                                  | 14   | RIKEN full-length enriched, adult male testis Mus musculus cDNA clone 4930521O11 5-                                       | 4930521O11    | AK015864  | A         | 2492          |
| BY714825                                  | 10   | RIKEN full-length enriched, adult male testis Mus musculus cDNA clone 4930431F10 5-                                       | 4930431F10    | AK015266  | GF        | 5092          |
| CJ159974                                  | 4    | RIKEN full-length enriched mouse cDNA library, Rathke-s pouches 14.5 days embryo Mus musculus cDNA clone K720041H22 5-    | K720041H22    | 5, 3 end  | GF        | 1611          |
| CJ160006                                  | 4    | RIKEN full-length enriched mouse cDNA library, Rathke-s pouches 14.5 days embryo Mus musculus cDNA clone K720045M06 5-    | K720045M06    | 5, 3 end  | GF        | 1611          |
| CJ160063                                  | 4    | RIKEN full-length enriched mouse cDNA library, Rathke-s pouches 14.5 days embryo Mus musculus cDNA clone K720049P11 5-    | K720049P11    | 5, 3 end  | GF        | 1611          |
| BB616468                                  | 5    | RIKEN full-length enriched mouse cDNA library, C57BL/6J testis male adult Mus musculus cDNA clone 4932416G22 5-           | 4932416G22    | AK030034  | GF        | 1316          |
| BB616213                                  | 1    | RIKEN full-length enriched mouse cDNA library, C57BL/6J testis male adult Mus musculus cDNA clone 4931420K07 5-           | 4931420K07    | AK029879  | GF        | 5468          |
| BB614575                                  | 11   | RIKEN full-length enriched, adult male testis Mus musculus cDNA clone 4921513H21 5-                                       | 4921513H21    | 5, 3 end  | GF        | 5707          |
| BB629795                                  | 15   | RIKEN full-length enriched mouse cDNA library, C57BL/6J vagina female adult Mus musculus cDNA clone 9930010I05 5-         | 9930010I05    | AK036791  | TF        | 6431          |
| CN690765                                  | 2    | NIA Mouse E10.5 whole embryo cDNA library (Long) Mus musculus cDNA clone NIA:E0300E06 IMAGE:30858965 5-                   | IMAGE30858965 | 5 end     | TF        | 4701          |
| BB614622                                  | 3    | RIKEN full-length enriched, adult male testis Mus musculus cDNA clone 4921521K05 5-                                       | 4921521K05    | 5, 3 end  | TF        | 6093          |
| BB616381                                  | 1    | RIKEN full-length enriched mouse cDNA library, C57BL/6J testis male adult Mus musculus cDNA clone 4932411L15 5-           | 4932411L15    | AK029971  | TF        | 5683          |
| CJ168023                                  | 6    | RIKEN full-length enriched mouse cDNA library, Rathke-s pouches 14.5 days embryo Mus musculus cDNA clone M130022C12 5-    | M130022C12    | 5, 3 end  | TF        | 6382          |
| BB614889                                  | 17   | RIKEN full-length enriched mouse cDNA library, C57BL/6J testis male adult Mus musculus cDNA clone 4930404G17 5-           | 4930404G17    | 5, 3 end  | TF        | 6863          |

**Table S3. AS L1 RIFTs were expressed genome-wide, as identified by a novel assay using exon microarray.**

Presented here is a list of genes expressed as spliced AS L1-gene RIFTs in adult B6 testis. For inclusion on this list, we required annotated RefSeq genes to be represented on an Affymetrix mouse exon microarray, at least five consecutive exons must show high signal intensities upon hybridization with AS L1 RIFT RT-PCR products, a reference full-length AS L1 element must reside within 100 kb of the high intensity probe sites mapped to the genome, and the initiating L1 must reside within 30 kb of the RefSeq gene. These criteria were chosen to reduce false positive calls of AS L1 RIFTs. Highlighted (*yellow*) are gene templates for AS L1 RIFTs that were also identified by another method (1).

|                |                    |                  |
|----------------|--------------------|------------------|
| <i>Aox3l1</i>  | <i>Prkdc</i>       | <i>Tek</i>       |
| <i>Spag16</i>  | <i>Zbtb20</i>      | <i>Car8</i>      |
| <i>Glrx2</i>   | <i>Slc9a10</i>     | 4930579C15Rik    |
| <i>Astn1</i>   | <i>Morc1</i>       | <i>Grk4</i>      |
| <i>Kifap3</i>  | 2310008H04Rik      | 4933428G09Rik    |
| <i>Fmn2</i>    | <i>Lamp3</i>       | <i>Rufy3</i>     |
| <i>Tram2</i>   | <i>Atp13a4</i>     | <i>Pitpnb</i>    |
| <i>Smap1</i>   | 2310005G13Rik      | A330021E22Rik    |
| <i>Bai3</i>    | <i>Prss7</i>       | <i>Adam22</i>    |
| <i>Hecw2</i>   | <i>Park2</i>       | <i>Gm440</i>     |
| <i>Pign</i>    | <i>Supt3h</i>      | <i>Cd36</i>      |
| <i>Ptpn4</i>   | <i>Emr1</i>        | <i>Stk32b</i>    |
| <i>Il20</i>    | AW061290           | <i>Lcorl</i>     |
| <i>Epm2a</i>   | <i>Crisp2</i>      | <i>Tmprss11d</i> |
| <i>Slc35f1</i> | <i>Tbc1d5</i>      | <i>Tmprss11b</i> |
| <i>Tpd52l1</i> | <i>Pcdha4</i>      | <i>Cnot6l</i>    |
| <i>Lace1</i>   | <i>Adamts19</i>    | <i>Antxr2</i>    |
| <i>Tmem16d</i> | <i>Pias2</i>       | <i>Glmn</i>      |
| BC067068       | <i>Ccny</i>        | <i>Rfc3</i>      |
| <i>Trhde</i>   | 4921528I01Rik      | <i>Ccdc132</i>   |
| <i>Slc16a7</i> | <i>Epb4.1l4a</i>   | <i>Phf14</i>     |
| <i>Fancl</i>   | <i>Stam</i>        | <i>Grid2</i>     |
| <i>Havcr1</i>  | <i>Slc39a12</i>    | <i>Smarcad1</i>  |
| <i>Tanc2</i>   | <i>Arhgap15</i>    | <i>Nr2c2</i>     |
| <i>Dgkb</i>    | <i>Ccdc34</i>      | <i>Asns</i>      |
| <i>Pnpla8</i>  | <i>Itga8</i>       | <i>Asz1</i>      |
| <i>Fut8</i>    | <i>Nsun6</i>       | <i>Iqub</i>      |
| <i>Gphn</i>    | <i>Dennd1a</i>     | <i>Tpk1</i>      |
| 4921509E07Rik  | <i>Scn1a</i>       | <i>Pde1c</i>     |
| <i>Lyst</i>    | <i>Zswim2</i>      | <i>Ctnna2</i>    |
| <i>Mctp1</i>   | <i>Elp4</i>        | <i>Otud7a</i>    |
| <i>Smn1</i>    | <i>Hao1</i>        | <i>Prpc</i>      |
| 5033411D12Rik  | <i>Tasp1</i>       | <i>Nars2</i>     |
| 4930486L24Rik  | OTTMUSG00000015730 | <i>Abca14</i>    |
| <i>Rhobtb3</i> | <i>Dnajc5b</i>     | LOC100047837     |
| <i>Erb2ip</i>  | <i>Spata16</i>     | <i>Ntrk3</i>     |
| <i>Wapal</i>   | <i>Pglyrp3</i>     | <i>Tpte</i>      |
| <i>Pcca</i>    | 4921515J06Rik      | <i>Tusc3</i>     |
| 4930452B06Rik  | <i>Dpyd</i>        | <i>Csmd1</i>     |
| 1700129C05Rik  | <i>Unc5c</i>       | <i>Ccdc7</i>     |
| <i>Fndc3a</i>  | <i>Etfdh</i>       | <i>Naalad2</i>   |
| <i>Diap3</i>   | <i>Sycp1</i>       | <i>Dock3</i>     |
| <i>Klhl1</i>   | <i>Gstcd</i>       | <i>Maoa</i>      |
| <i>Colec10</i> | <i>Pkn2</i>        | <i>Gria3</i>     |
| <i>Khdrbs3</i> | 4930473A06Rik      | <i>Asb9</i>      |
| <i>Rspo2</i>   |                    |                  |

Table S4. Alignment of splice donor and splice acceptor sites in fusion transcripts.

Genomic template sequences flanking the first introns of antisense L1 fusion transcripts, including splice donor and splice acceptors, were aligned. The spliced intronic sequences are highlighted (*red*) and canonical splicing donor (GT) and acceptor (AT) sites are underlined. Exon sequences are shown in capital letters (*black*). Splice donor sites were grouped into arbitrary consensus types I – VIII based on intron alignments, and splice position is indicated, based on L1spa coordinates (*splice type, position*).

| ASL1 fusion transcripts | splice donor                |       | splice acceptor              | splice type, position |
|-------------------------|-----------------------------|-------|------------------------------|-----------------------|
| 1ASII1                  | TCTGGTGATG <u>gtgagtgg</u>  | ..... | <u>tcctccag</u> CCTCTCACCC   | I 1838                |
| 2AS1-1                  | TCTAGTGATG <u>gtgagtgg</u>  | ..... | <u>ctattccag</u> AAAGTAGATC  | I                     |
| 4ASIII2-1/4AS1-1        | TTTGGTGATG <u>gtgagtgg</u>  | ..... | <u>ttccaccag</u> GTGGCTCGGA  | I                     |
| 4ASIII1-1               | TCTGATGATG <u>gtgagtgg</u>  | ..... | <u>atcccctag</u> GGATAGGAAT  | I                     |
| 5AS1-1                  | TCTGGTGATG <u>gtgagtgg</u>  | ..... | <u>ctgctacag</u> ACAATACAGC  | I                     |
| 5ASII                   | TCTGATGATG <u>gtgagtgg</u>  | ..... | <u>taigcccag</u> AAACTCAACG  | I                     |
| 10AS1-1                 | TCTGTTGATG <u>gtgagtgg</u>  | ..... | <u>ttcaccag</u> CTGCTTTTCA   | I                     |
| 7ASII1                  | TCTGATGATG <u>gtgagtgg</u>  | ..... | <u>ggtttcag</u> GATAGAATA    | I                     |
| 7ASIII2-1B              | TCTGGTGATG <u>gtgagtgg</u>  | ..... | <u>ctttcacag</u> GTCTATCATG  | I                     |
| 7ASIII4-2               | TCTGGTGATG <u>gtgagtgg</u>  | ..... | <u>tgtttttag</u> GCCTAGACGT  | I                     |
| 12ASII4                 | TCTGATGATG <u>gtgagtgg</u>  | ..... | <u>tgttatcag</u> AACCTTCACT  | I                     |
| Pign                    | TCTGATGATG <u>gtgagtgg</u>  | ..... | <u>ttctgcag</u> CCTCTTCTCT   | I                     |
| 11ASII1/2ASII1          | AGGTTCTCAG <u>gtgtgttg</u>  | ..... | <u>tcaccaag</u> ATGGAGGCAA   | II 1892               |
| 8AS1-1                  | AGGTTCTCAG <u>gtgtgttg</u>  | ..... | <u>ttctggcag</u> GTGAACTATG  | II                    |
| 9AS1-1                  | AGGTTCTCAG <u>gtgtgttg</u>  | ..... | <u>ttttcttag</u> AGAGAAACAA  | II                    |
| 7ASIII2-1A              | AGGTTCTCAG <u>gtgtgttg</u>  | ..... | <u>cactggcag</u> AATCCTAAGG  | II                    |
| 11AS1-1                 | AGGTTCTCAG <u>gtgtgttg</u>  | ..... | <u>aaattctag</u> GATAGTCTCA  | II                    |
| 70-8-1/10ASIII4-2       | ATTAACCTTG <u>gataataa</u>  | ..... | <u>attttaag</u> GAACCATGGT   | III 1540              |
| 5ASIII3-1               | TTTGCCATCT <u>gataatctc</u> | ..... | <u>agacccta</u> TCCTCTGGCT   | IV 1785               |
| DBA 2A03                | TCTGATGATG <u>gtgagtgg</u>  | ..... | <u>ttttcttag</u> ATTCTACTGA  | I                     |
| B6 2B11                 | TCTGATGATG <u>gtgagtgg</u>  | ..... | <u>tgttccag</u> CTGTATCTAA   | I                     |
| B6 2C04                 | TCTGAGGATG <u>gtgagtgg</u>  | ..... | <u>ctttcttag</u> GGAAGGTGCA  | I                     |
| B6 2C06                 | TCTGATGATG <u>gtgagtgg</u>  | ..... | <u>ttccacag</u> AAACAACTA    | I                     |
| B6 2D07                 | TCTGATGATG <u>gtgagtgg</u>  | ..... | <u>ctttcttag</u> GGAAGGTGCA  | I                     |
| B6 B05                  | TCTGATGATG <u>gtgagtgg</u>  | ..... | <u>fatgtccag</u> AGATTACATC  | I                     |
| B6 B07/C01/2C01         | TCTGATGATG <u>gtgagtgg</u>  | ..... | <u>gattaatag</u> ATAATATTG   | I                     |
| B6 C02                  | TTTGATGATG <u>gtgagtgg</u>  | ..... | <u>lcaagacag</u> GGTTTCTCTG  | I                     |
| B6 C03                  | TCTGATGATG <u>gtgagtgg</u>  | ..... | <u>tctctgcag</u> CTGTACAGT   | I                     |
| B6 E07                  | TCTGATGATG <u>gtgagtgg</u>  | ..... | <u>tcctccag</u> ATGTCTACCA   | I                     |
| DBA 2C06                | TCTGATGATG <u>gtgagtgg</u>  | ..... | <u>tcgtggcag</u> GAAAGTGCCC  | I                     |
| DBA C02                 | TCTGATGATG <u>gtgagtgg</u>  | ..... | <u>tcctccag</u> ATGTCTACCA   | I                     |
| DBA B10                 | TCTGATGATG <u>gtgagtgg</u>  | ..... | <u>ttgttcag</u> GACACACTCA   | I                     |
| DBA 2C05                | TCTGGTGATG <u>gtgagtgg</u>  | ..... | <u>tcattatcag</u> CAACTTGAAT | I                     |
| DBA A11                 | TCTGATGATG <u>gtgagtgg</u>  | ..... | <u>actcatag</u> GTCAACAGAA   | I                     |
| DBA D11/C12/B09/D10     | TCTGATGATG <u>gtgagtgg</u>  | ..... | <u>tcctaacag</u> CACCCCCAT   | I                     |
| DBA A02                 | AGGTTCTCAG <u>gtgtgttg</u>  | ..... | <u>ttacatag</u> GAATATACAG   | II                    |
| DBA 2E01                | AGGTTCTCAG <u>gtgtgttg</u>  | ..... | <u>gccttacag</u> GACCAGCCGA  | II                    |
| B6 E02                  | GATGTGGTGA <u>gtgtcttg</u>  | ..... | <u>tcctcagag</u> TGATGATTCT  | V 1834                |
| B6 2E10                 | GGAGTGCTGG <u>attctgatg</u> | ..... | <u>atagtctac</u> TTCCTATGGA  | VI 1850               |
| DBA C07                 | CAAGTGCTAC <u>gttctgatg</u> | ..... | <u>ccccaaag</u> ACAAAGTCTG   | VI 1850               |
| DBA A06/2A04            | CCTGGACTGG <u>gccaagtgg</u> | ..... | <u>tgcttttag</u> AAATATAAAC  | VII 1869              |
| DBA 2A12 (di)           | GTTCTCAGGT <u>gtgttggg</u>  | ..... | <u>gtacttcag</u> ATTATTTAAA  | VIII 1890             |
| DBA B08 (di)            | GTTCTCAGGT <u>gtgttggg</u>  | ..... | <u>attttcag</u> CTAAAATATC   | VIII 1890             |
| AK015008                | TCTGGTGATG <u>gtgagtgg</u>  | ..... | <u>attttcag</u> GTCTTGTTA    | I                     |
| AK007235                | TCTGGTGATG <u>gtgagtgg</u>  | ..... | <u>tttttcag</u> ATTCTGGTGG   | I                     |



|               |                    |       |                     |    |
|---------------|--------------------|-------|---------------------|----|
| AK015778      | TCTGATGATGgtgagtgg | ..... | ttcttcagACCAGCGTAT  | I  |
| AK131682      | TCTGATGATGgtgagtgg | ..... | ttcttcagACCAGCGTAT  | I  |
| AK015845      | TCTGATGATGgtgagtgg | ..... | ctgctccagATTTCAAAGC | I  |
| AK016072      | TCTGATGATGgtgagtgg | ..... | ttgtgctagGCCATAAAAT | I  |
| AK0132741     | TCTGATGATGgtgagtgg | ..... | tctaccagGTATAGAATT  | I  |
| AK132928      | TCTGATGATGgtgagtgg | ..... | ttctgcagCCTCTTCTCT  | I  |
| AK161293      | TCTGGTGATGgtgagtgg | ..... | tttttttagGACTGTACAG | I  |
| AK135585      | TCTGATGATGgtgagtgg | ..... | caatttcagCTCCTCTTTG | I  |
| AK015524      | AGGTTCTCAGgtgtgtgg | ..... | tatttcagCTTCCCTAAA  | II |
| AK015524B     | AGGTTCTCAGgtgtgtgg | ..... | aaatttcagTTTATTGATG | II |
| CF106266      | TCTGATGATGgtgagtgg | ..... | gttcttagACCAATCAAG  | I  |
| BB615298      | TCTGGTGATGgtgagtgg | ..... | gtgcacagATATATACAA  | I  |
| BB614971      | TCTGATGATGgtgagtgg | ..... | ttctccagATTCATGAAA  | I  |
| CA463860      | TCTGATGATGgtgagtgg | ..... | ttctgaagGAATGTACAA  | I  |
| Amph fusion   | TCTGGTGATGgtgagtgg | ..... | gttttcagGCAGAGGGTA  | I  |
| Antxr2 fusion | TCTGATGATGgtgagtgg | ..... | cctttcagATATTAGCTC  | I  |
| Ube3a fusion  | AGGTTCTCAGgtgtgtgg | ..... | tcacattagGGAGTTCTGG | II |
| Sulg2 fusion  | AGGTTCTCAGgtgtgtgg | ..... | tctccctagGCCGGTCACT | II |
| Herc2 fusion  | AGGTTCTCAGgtgtgtgg | ..... | ttgttcagATGTGAATGA  | II |
| Fgf17 fusion  | AGGTTCTCAGgtgtgtgg | ..... | ttcttcagGATGTTTTTA  | II |

**SUPPLEMENTARY FIGURE LEGENDS.****Fig. S1. Additional reporter assays identify AS promoter activity within ORF1 of certain other L1 elements.**

Additional mouse L1 fragments (sources and coordinates, Table S1) were engineered upstream of the beta-lactamase *TEM1* reporter in the orientation indicated by arrows, and assayed for promoter activity (Fig. 1). Linearized DNAs containing the promoter-reporter cassette were transfected into cultured HeLa (human cervical carcinoma) and CRL-2196 (mouse spermatocyte) cells. Reporter expression was detected by staining cells with CCF2-AM, whose green fluorescent emission spectrum shifts to blue upon cleavage by beta-lactamase (3). Promoter activity scores (*colors in key, top*) were assigned to each strand-specific candidate tested. Fragments are mapped to L1spa coordinates (*arrows*). The sources of fragments and the cell lines used for transfection also are indicated.

**Fig. S2. Alignments of L1 subfamily and recoded ORF1 sequences spanning the AS promoter.**

(A) AS L1 subfamily consensus sequences, corresponding to the active AS promoter region centered on ORF1 (Fig. 1, Fig. S1), were generated for four subfamilies, T<sub>F</sub>, G<sub>F</sub>, A and FII by querying the mouse reference genome (UCSC mm10) using seed sequences L1G<sub>F</sub>62, L1spa and L1Md\_A2. In each case, >80 genomic elements were found that aligned at >97% identity to the query sequence. Consensus sequences were defined by majority rule. They were aligned to corresponding regions of smL1 (also called ORFeus) (4), and to our novel, recoded L1 in pJL3. Coordinates and the reference sequence were based on L1spa (L1 T<sub>F</sub>). Predicted transcription factor binding sites were identified using TFSEARCH: Searching Transcription Factor Binding Sites (v. 1.3) (<http://www.cbrc.jp/research/db/TFSEARCH.html>). As shown here, they are underlined and labeled above the sequences. *Yellow highlights*: single nucleotide differences between subfamilies; *gray highlights*: differences between consensus elements and individual surrogates; *asterisks below aligned nucleotides*: conserved among all 6 aligned elements. (B) Plot of the fractional mismatch in 60 nt windows spanning the ORF1 region, presented in the sense orientation (based on L1spa reference sequence). *Arrow*: approximate location of AS promoter.

Fig. S3. **Genomic templates of AS L1 RIFTs.** (A) Schematic of an AS L1 integrant, located within an intron of an arbitrary gene. 5' UTR, 5' untranslated region; ORF1, open reading frame-1; LPR, length polymorphism region. (B) Schematics of diverse genomic templates and exons displaying the templates for specific AS L1 RIFTs, following a previously published format (5). Fusion AS L1-gene cDNAs were aligned to the B6 reference genome (UCSC browser, release mm8). Chromosomal sequences are represented by single horizontal lines, and spliced exons included in the cognate gene and/or RIFT are indicated by rectangles: (*black*) conventional transcript exons omitted from RIFTs; (*red*) first alternative first L1 exon; (*blue*) conventional transcript exons included in RIFTs; and (*green*) RIFT exons omitted from conventional transcripts. Also indicated are the cDNA clone and gene names (*left*) and the genomic length (bp) spanned by the L1 RIFT (*right*).

Fig. S4. **Tissue-specific expression of L1 RIFTs.**

RT-PCR was performed for 17 pairs of L1 fusion transcripts (*upper panel of each pair*) and their overlapping cognate genes (where applicable; *lower panels*). A mouse multiple tissue cDNA panel, generated from a mouse strain known to include indicated L1 variants, was used in this screen. The tissues are: 1, heart; 2, brain; 3, spleen; 4, lung; 5, liver; 6, skeletal muscle; 7, kidney; 8, testis; 9, 7-day embryo; 10, 11-day embryo; 11, 15-day embryo; 12, 17-day embryo; 13, H<sub>2</sub>O. As a positive control, *GAPDH* transcripts were amplified by RT-PCR.

Fig. S5. **Logo bitmap of splice donor and acceptor sites.** Spliced fusion transcripts were aligned to genomic templates, and 10 nucleotides on either side of (A) splice donor and (B) splice acceptor sites were aligned. (See Table S4.) Logo bitmaps indicate that the consensus L1 fusion transcript splice sites follow well-characterized splicing patterns.

Fig. S6. **AS L1 promoter activity may contribute to reduced native L1 transcription.** To evaluate the effects of native AS ORF1 transcription upon transfected L1 retrotransposon transcript levels expressed from donor plasmids, we transiently transfected native, hybrid and fully synthetic elements. Transcript levels of the various L1 elements were measured by qRT-PCR assays of ORF2 levels, normalized to *Hygro<sup>R</sup>* transcript levels (*y-axis*, presented as log<sub>2</sub> of transcription concentration, based on  $\Delta Ct = -(Ct(ORF2) - Ct(Hygro))$ ). *Categories*, *x-axis*: T<sub>F</sub>, native L1spa from pTN201; recoded/T<sub>F</sub>, neutral changes in A/T content of recoded ORF1 in pJL3; smL1/T<sub>F</sub>, low A/T content of ORF1 swapped from smL1 into L1spa, resulting in a hybrid L1

donor, pMK28; smL1, fully synthetic L1 ORF1 and ORF2 in pCEP4/smL1. *Values*, mean of duplicates; *error bars*, range.

**Fig. S7. AS L1 transcripts limit retrotransposition by synthetic and native L1 elements *in trans*.** We studied the effects of AS RIFTs (expressed *in trans*) on (A) smL1 or (B) native L1 retrotransposition frequencies. (A) To generate AS smL1 RIFTs, first we directionally cloned four AS fragments derived from smL1 (*schematic at top*), i.e. mapping to corresponding L1spa coordinates 2119-1120 (PCR amplicon DES3820 x DES3818, Table S1); 2800-1120 (DES3821xDES3818); 2119-1812 (DES3820 x DES3819); and 2800-1812 (DES3821 x DES3819). These fragments were cloned into pCEP4 downstream of its strong CMV promoter. Each cloned construct was co-transfected into HeLa cells with the smL1 retrotransposition donor plasmid, pCEP4/smL1/Neo-AI. As positive and negative controls, the smL1 donor alone and empty pCEP4 alone were transfected into HeLa cells, respectively. After transfections, cells were plated at dilutions (i.e. 1x, 1/10, 1/100), selected on G418 for 2 weeks in a transient retrotransposition assay (6), and Neo<sup>R</sup> colonies were stained and counted (Fig. 6). We observed non-linear saturation of colony numbers at the 1x plating density (not shown), so only the 1/10 and 1/100 dilutions are shown. (B) (*Schematic at top*) Three different AS native L1T<sub>F</sub> fragments (derived from L1spa template in pTN201) i.e. mapping to L1spa coordinates 2823-1286, 2150-1286 and 2150-1636, were amplified from L1spa using primers DES2879-DES2882; Table S1B). These fragments were directionally cloned into pCEP4 downstream of its strong CMV promoter. Each cloned construct was co-transfected into HeLa cells with the native L1spa (L1 T<sub>F</sub>) donor plasmid, pTN201. As positive and negative controls, L1spa and empty vector pCEP4 were transfected alone, respectively. After transfection, equal numbers of HeLa cells were plated, selected on G418 for 2 weeks, and Neo<sup>R</sup> colonies were stained and counted.

**Fig. S8. Minimal role of Dicer in regulating L1 retrotransposition.** Retrotransposition of various L1 elements was assayed in the presence or absence of Dicer. We quantified spliced *TEM1*, expressed from retrotransposed genomic integrants, using qRT-PCR of spliced *TEM1* transcripts. *Y-axis*: delta Ct = Ct (*TEM1*) – Ct (*GAPDH*). Higher Ct values correspond to lower transcript template concentrations. *X-axis categories*: T<sub>F</sub>, native L1spa from pTN201; recoded/T<sub>F</sub>, neutral changes in A/T content of recoded ORF1 in pJL3; smL1/T<sub>F</sub>, low A/T content in ORF1 swapped from smL1 into L1spa (L1 T<sub>F</sub>), resulting in a hybrid L1 donor, pMK28; smL1, fully synthetic L1 ORF1 and ORF2 in pCEP4/smL1. *Values*, mean of duplicates; *error bars*, range; *black bars*, HCT116 wildtype cells; *white bars*, HCT116 Dicer ex 5 -/- cells.

**SUPPLEMENTARY REFERENCES**

1. Akagi, K., Li, J., Stephens, R.M., Volfovsky, N. and Symer, D.E. (2008) Extensive variation between inbred mouse strains due to endogenous L1 retrotransposition. *Genome Res*, 18, 869-880.
2. Zemojtel, T., Penzkofer, T., Schultz, J., Dandekar, T., Badge, R. and Vingron, M. (2007) Exonization of active mouse L1s: a driver of transcriptome evolution? *BMC Genomics*, 8, 392.
3. Zlokarnik, G., Negulescu, P.A., Knapp, T.E., Mere, L., Burren, N., Feng, L., Whitney, M., Roemer, K. and Tsien, R.Y. (1998) Quantitation of transcription and clonal selection of single living cells with beta-lactamase as reporter. *Science*, 279, 84-88.
4. An, W., Han, J.S., Wheelan, S.J., Davis, E.S., Coombes, C.E., Ye, P., Triplett, C. and Boeke, J.D. (2006) Active retrotransposition by a synthetic L1 element in mice. *Proc Natl Acad Sci U S A*, 103, 18662-18667.
5. Peaston, A.E., Evsikov, A.V., Graber, J.H., de Vries, W.N., Holbrook, A.E., Solter, D. and Knowles, B.B. (2004) Retrotransposons regulate host genes in mouse oocytes and preimplantation embryos. *Dev Cell*, 7, 597-606.
6. Wei, W., Morrish, T.A., Alisch, R.S. and Moran, J.V. (2000) A transient assay reveals that cultured human cells can accommodate multiple LINE-1 retrotransposition events. *Anal Biochem*, 284, 435-438.

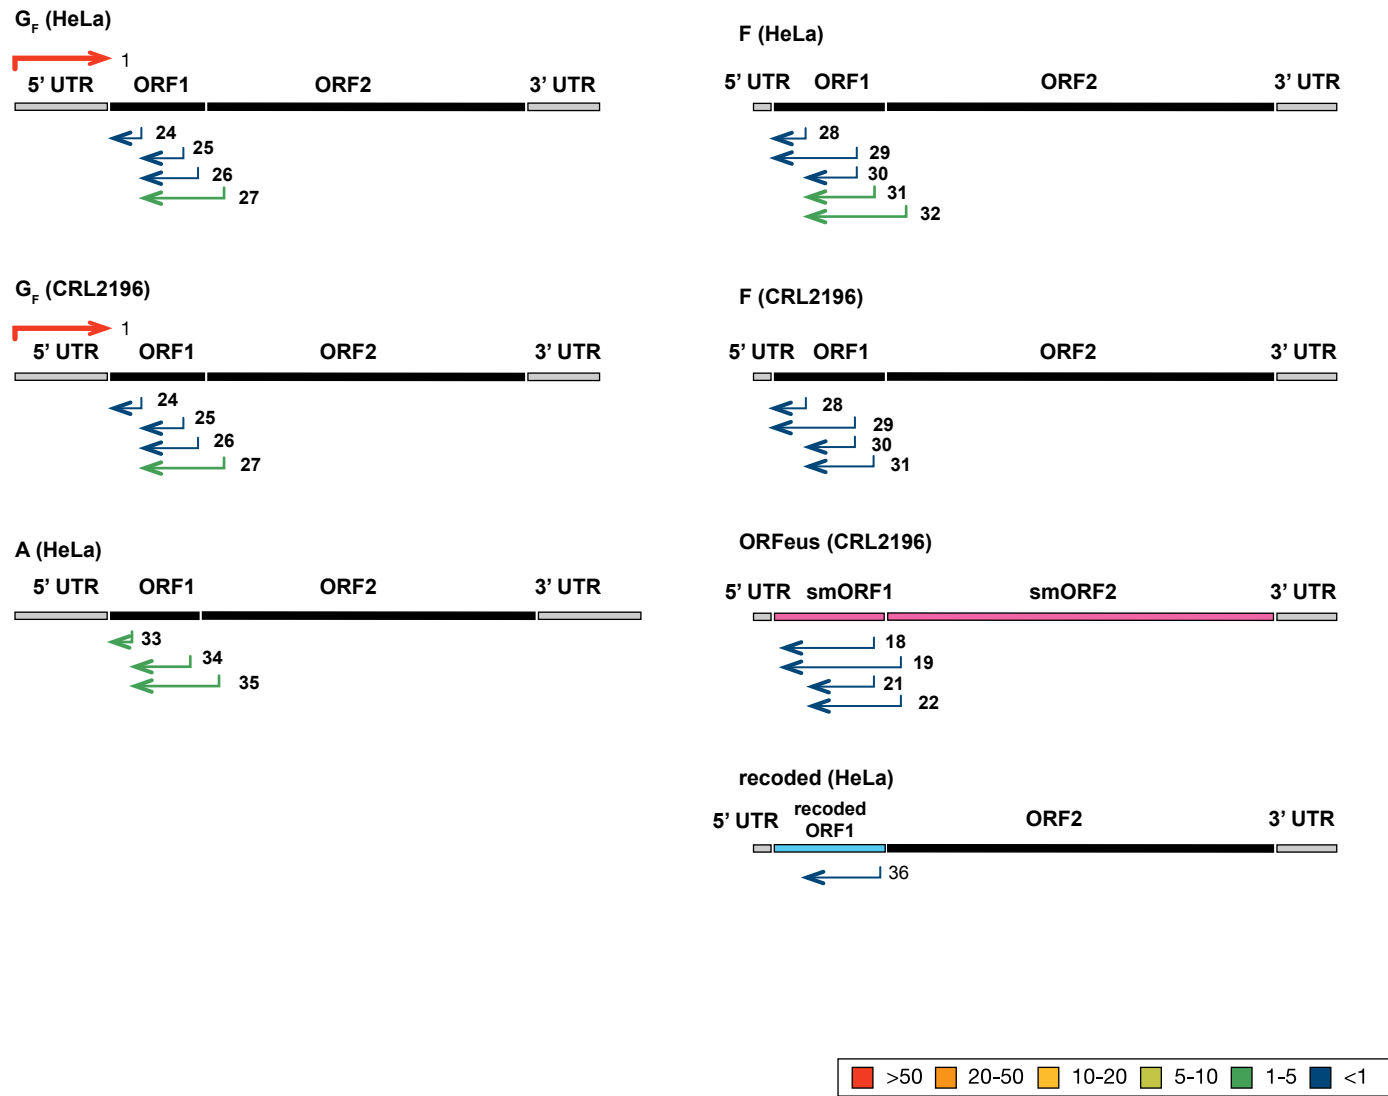

Fig. S1 Li et al.



**B**

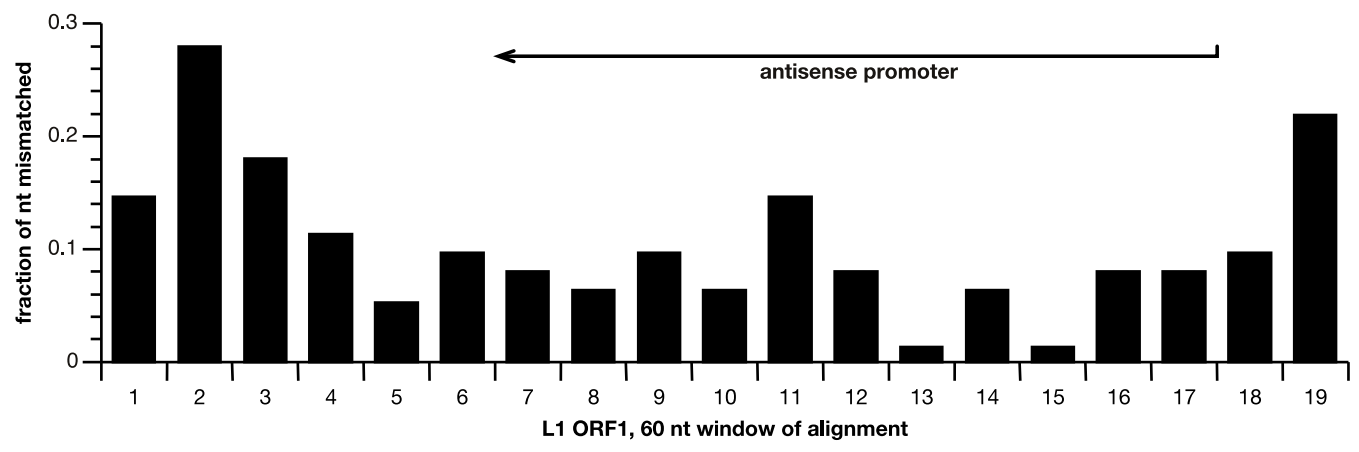



**A**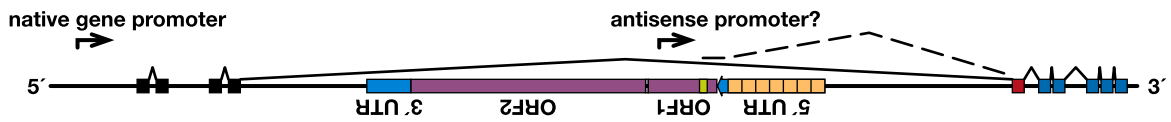**B**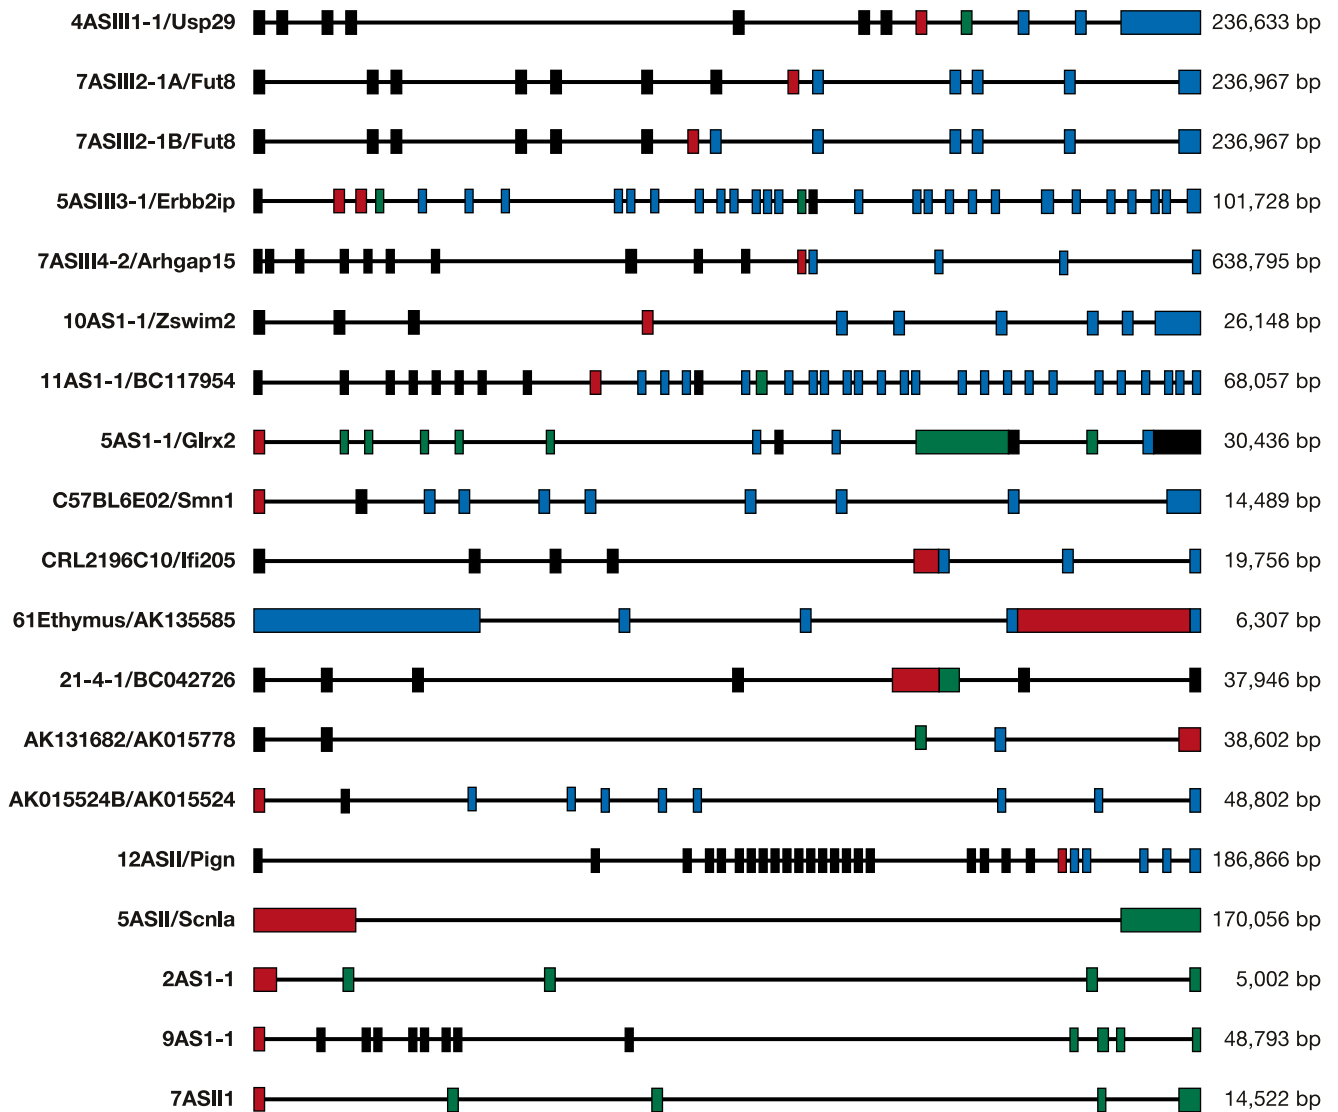

Fig. S3 Li et al.

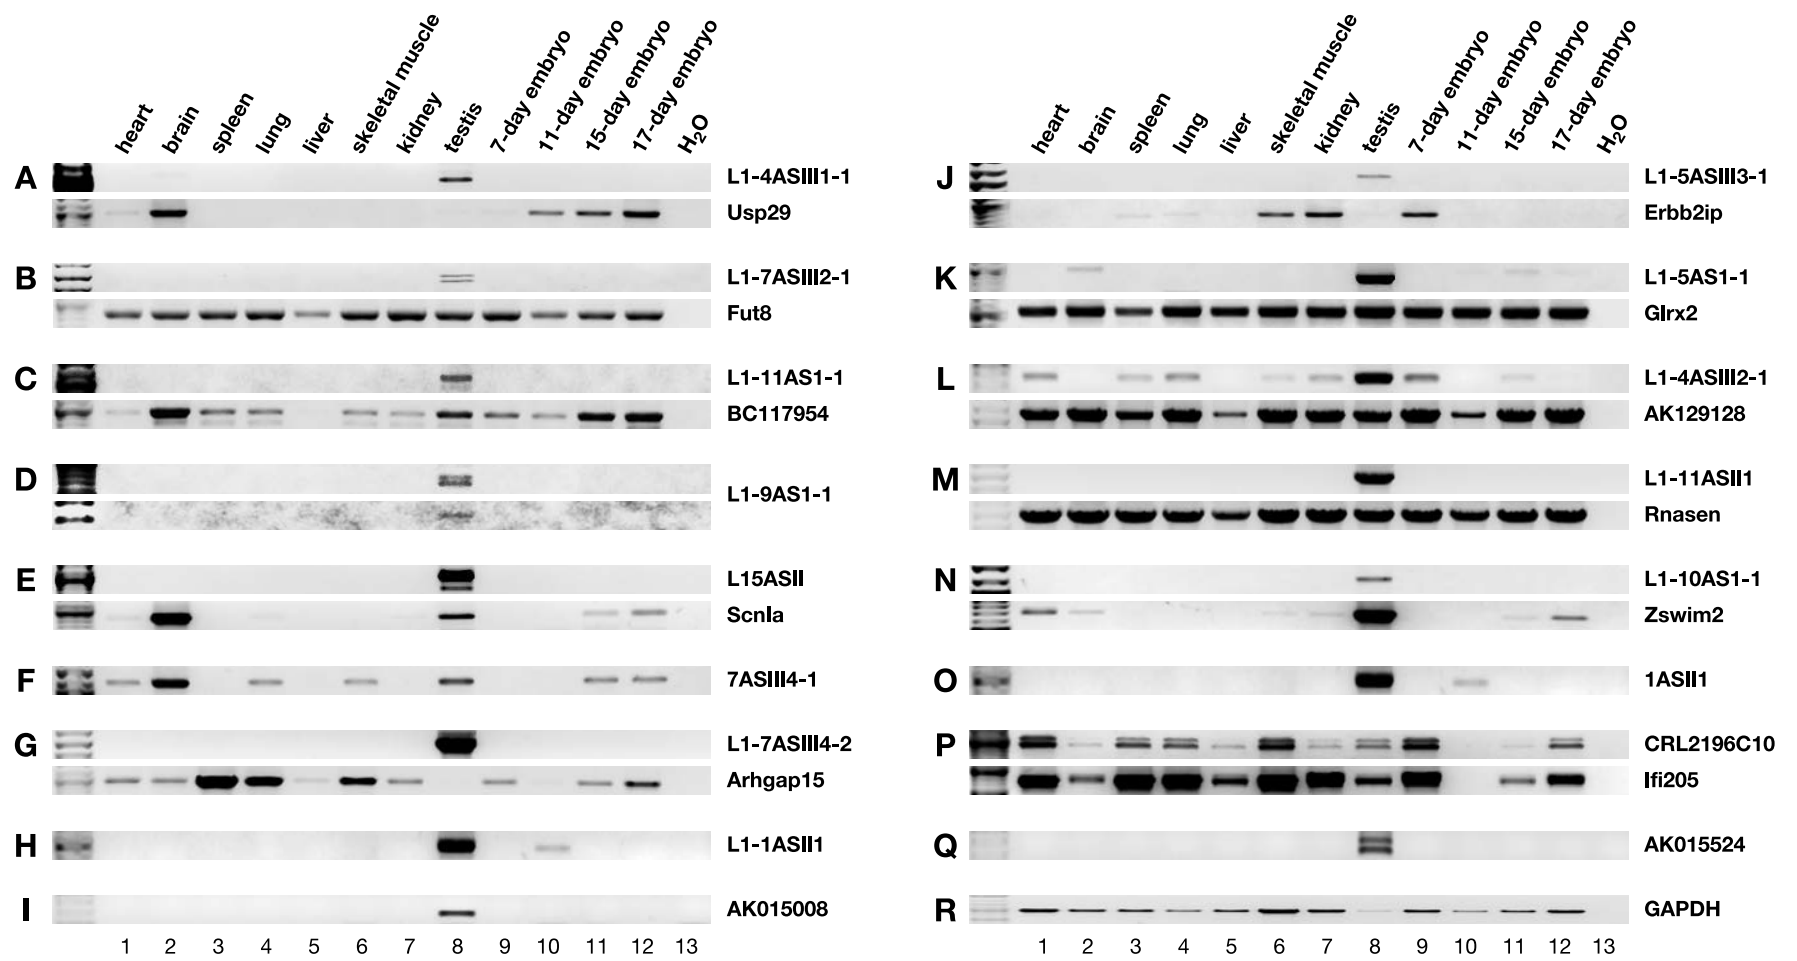

Fig. S4 Li et al.



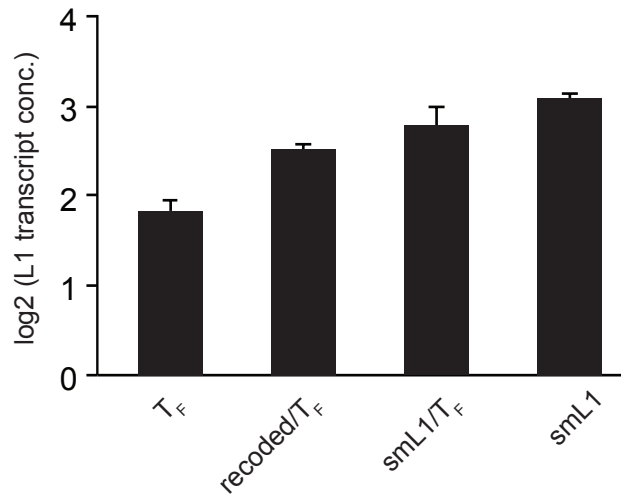

Fig. S6 Li et al.

**A**

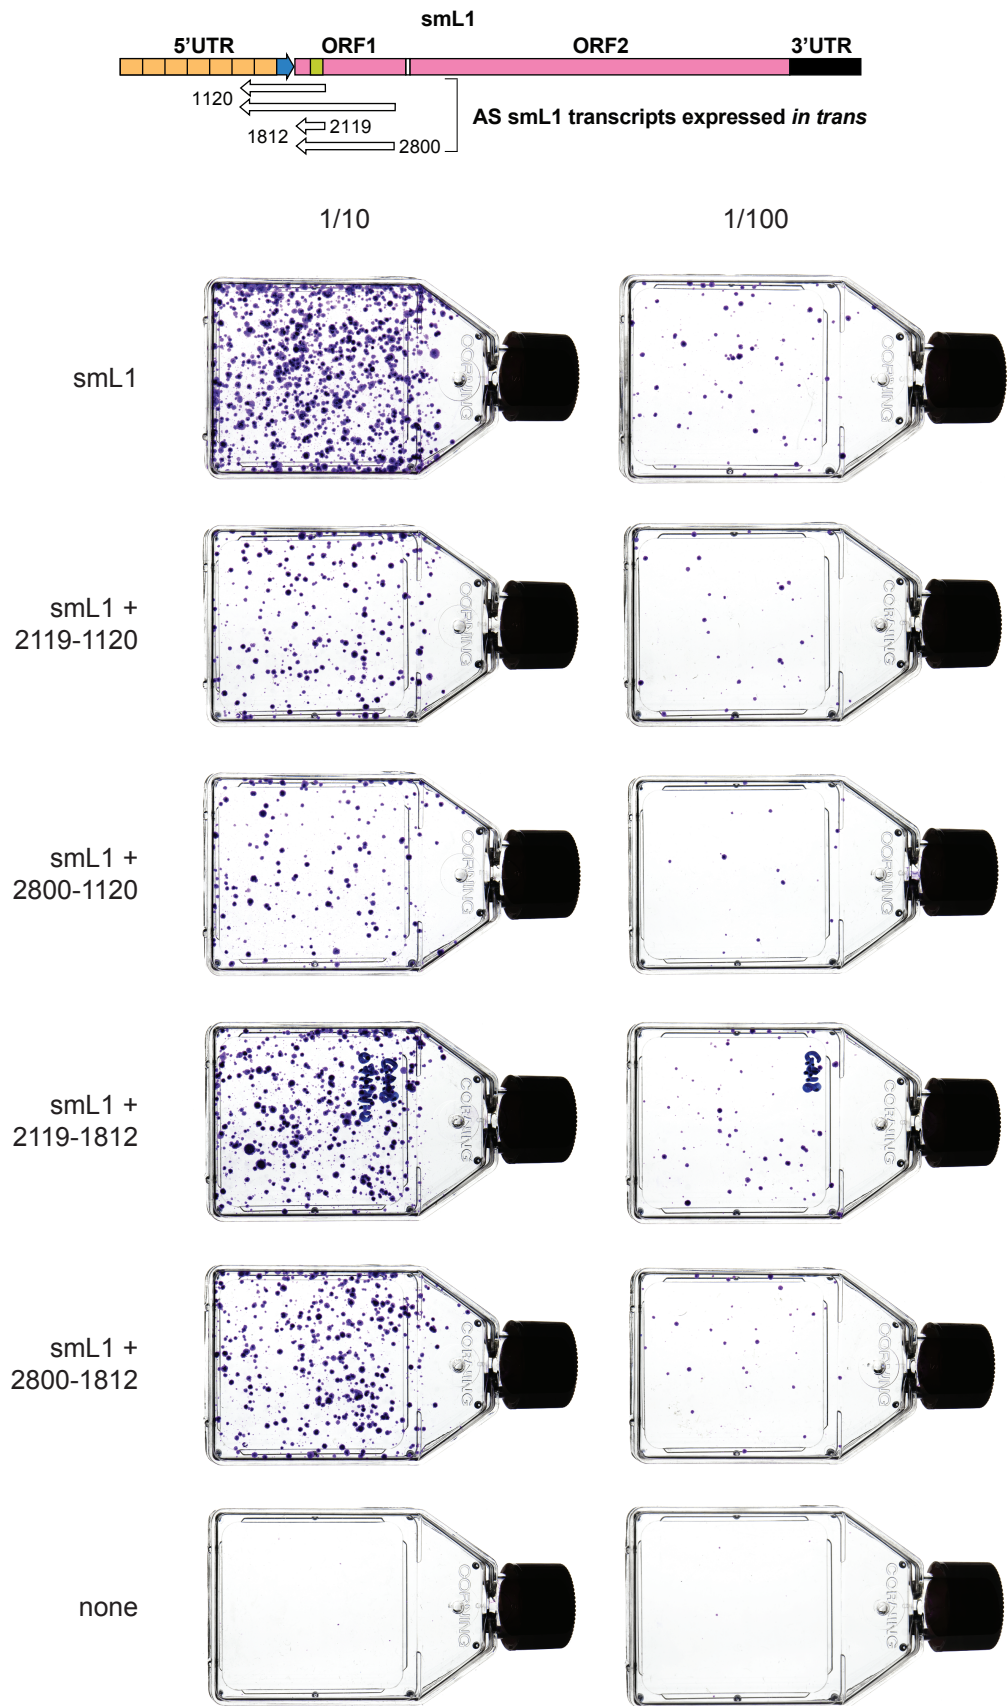

Supp. Fig. 7A

**B**

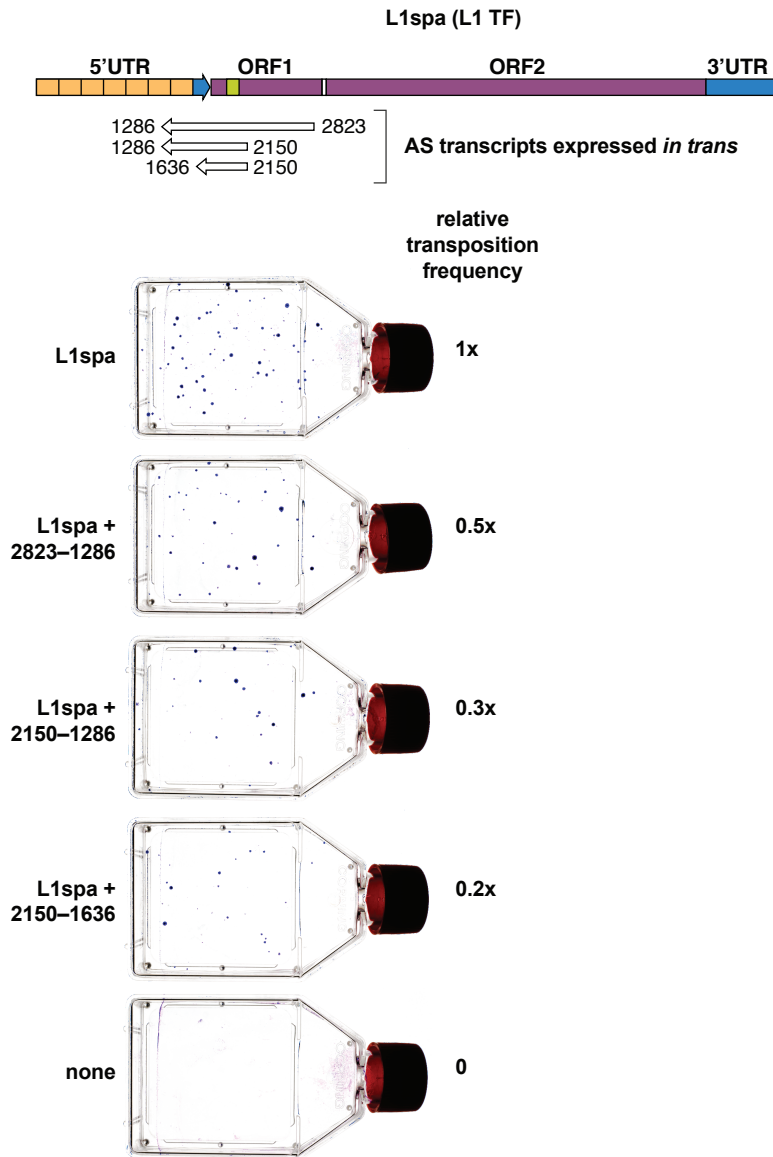

Supp. Fig. 7B

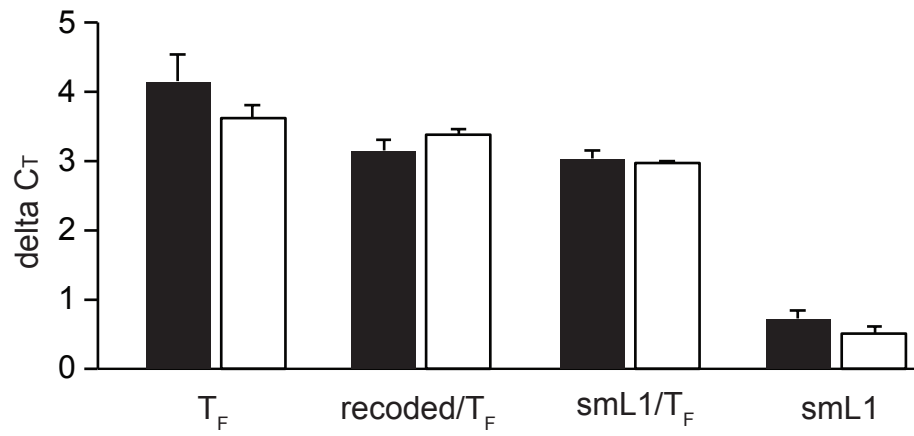

Fig. S8 Li et al.
